# Supplementary material
Source: PubMed Central journal article supplement (PMC5701517)
Supplement: NIHMS919784-supplement-SI.pdf [file NIHMS919784-supplement-SI.pdf]

Supplementary Materials for  
**An automated smartphone-based diagnostic assay for point-of-care  
semen analysis**

Manoj Kumar Kanakasabapathy, Magesh Sadasivam, Anupriya Singh, Collin Preston,  
Prudhvi Thirumalaraju, Maanasa Venkataraman, Charles L. Bormann,  
Mohamed Shehata Draz, John C. Petrozza, Hadi Shafiee\*

\*Corresponding author. Email: hshafiee@bwh.harvard.edu

Published 22 March 2017, *Sci. Transl. Med.* **9**, eaai7863 (2017)  
DOI: 10.1126/scitranslmed.aai7863

**The PDF file includes:**

Materials and Methods

Fig. S1. Image of a micrometer scale taken with the smartphone-based semen analyzer.

Fig. S2. Images of microbeads and sperm taken with a laboratory-based microscope and the smartphone-based semen analyzer.

Fig. S3. Process flow of microchip fabrication.

Fig. S4. Smartphone application flow.

Fig. S5. Device performance for samples with concentrations below 100 million sperm/ml.

Fig. S6. Bland-Altman analysis for the measurement of sperm curvilinear (VCL) and linear velocities (VSL).

Fig. S7. Weight scale schematic and design.

Fig. S8. Weight scale performance in estimating the total count and total motile count.

Fig. S9. Bland-Altman analysis of the three phones.

Fig. S10. Overall agreement and diagnostic performance of the smartphone-based semen analyzer.

Fig. S11. Steps of operation for semen testing using the smartphone-based semen analyzer.

Table S1. Table of costs.

Table S2. Processing times for the 350 samples tested by trained and untrained users.

Table S3. Raw data of cryopreserved samples collected for measuring sperm concentration.

Table S4. Raw data collected from clinical specimens at MGH fertility clinic tested by trained users.

Table S5. Repeatability measures for the concentration parameter.

Table S6. Repeatability measures for the motility parameter.

Table S7. Diagnostic results for samples tested by trained users.

Table S8. Comparison of the performance of three different phones with the smartphone-based semen analyzer.

Table S9. Raw data collected from clinical specimens at MGH fertility clinic tested by untrained users.

Table S10. Diagnostic results for samples tested by untrained users.

Table S11. CASA triplicate measurements at MGH fertility clinic for 112 samples.

Table S12. Measurement of CASA accuracy against manual analysis.

Legend for movie S1

**Other Supplementary Material for this manuscript includes the following:**

(available at

[www.sciencetranslationalmedicine.org/cgi/content/full/9/382/eai7863/DC1](http://www.sciencetranslationalmedicine.org/cgi/content/full/9/382/eai7863/DC1))

Movie S1 (.mp4 format). Video of a semen sample recorded with the smartphone-based semen analyzer.

## **Materials and Methods**

**Weight scale design:** We designed a miniaturized weight scale that was wirelessly connected to the smartphone-based platform to measure total sperm count and total motile sperm count in addition to sperm concentration and motility (fig. S7). A micro load cell (CZL639HD\_3139, Phidgets), was used as the force sensing module along with an amplifier (HX711, Chenbo). The single point load cell was mounted onto a 3D printed base. A small 3D printed platform was attached to the other end of the load cell. The amplifier was interfaced with a low power microcontroller (ATMEGA328, Kookye). The microcontroller was programmed to read the amplified data and calibrated using samples with known weights. This device was designed to function wirelessly via Bluetooth. The serial connection setup was achieved by interfacing the Bluetooth module (HC-05, Jbtek) with the microcontroller. Our customized software application on the smartphone was able to communicate with the device to collect data and calibrate the system when necessary. The 3D printed weight scale was  $\sim 76 \times 60 \times 15$  mm in size and weighed  $\sim 37$  g. The weight scale was powered by two 3 V batteries (CR1620).

**Weight scale experiments:** We tested the functionality of the portable weight scale using semen samples with clinically relevant sample weights up to 25 g (fig. S8A). The weight scale module was designed to be able to measure samples with a maximum weight of 120 g. We observed a perfect Pearson's correlation coefficient 'r' of 1 (n=27) between the portable scale and a standard laboratory-based grade weight scale (EP64, Explorer Pro).

We proceeded to test the capability of our portable scale to estimate total sperm count and total motile sperm count of semen samples (fig. S8B, C). We tested a total of 14 patient semen

samples in our preliminary experiments. The samples' weight was converted to volume by multiplying it by a factor of 1.01 as recommended by the WHO 2010 semen analysis guidelines. The total sperm count and total motile sperm count of the samples were calculated based on the sample volume, concentration, and motility. These results were compared with the results obtained using CASA and a weight scale used at the MGH fertility clinic. A Pearson's coefficient analysis showed a good correlation between the results obtained by the smartphone-based platform and CASA (fig. S8B, C, n=14).

**CASA repeatability:** In an effort to evaluate the repeatability of the CASA used in our study, we performed replicate measurements for 112 semen samples and calculated its repeatability measurement (table S6). The repeatability of measurements obtained by CASA was defined as the percentage of variation in measured magnitudes of concentration or motility for each individual sample.

It is given by the following formula:

$$\% \text{ repeatability} = \left( \frac{\text{mean of measured magnitudes}}{\text{mean of measured magnitudes} + \text{standard error of mean}} \right) * 100$$

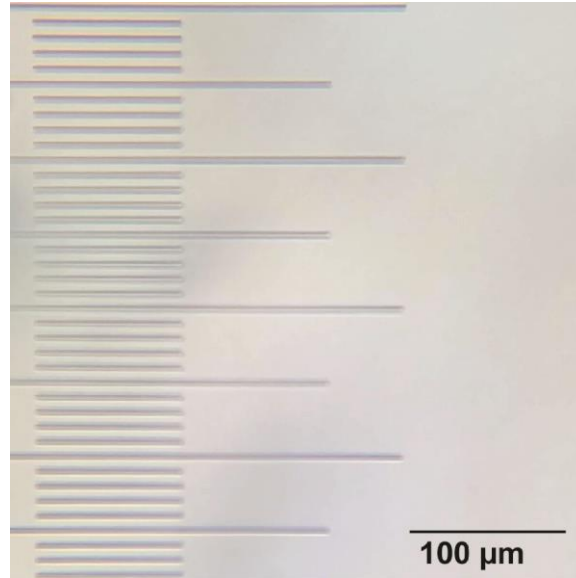

**Fig. S1. Image of a micrometer scale taken with the smartphone-based semen analyzer.** The spacing between the divisions of the stage micrometer (36121, Edmund optics) is 10  $\mu\text{m}$ . The total image area in pixels is 886  $\times$  886. One micron is represented by 2.4 pixels in this image.

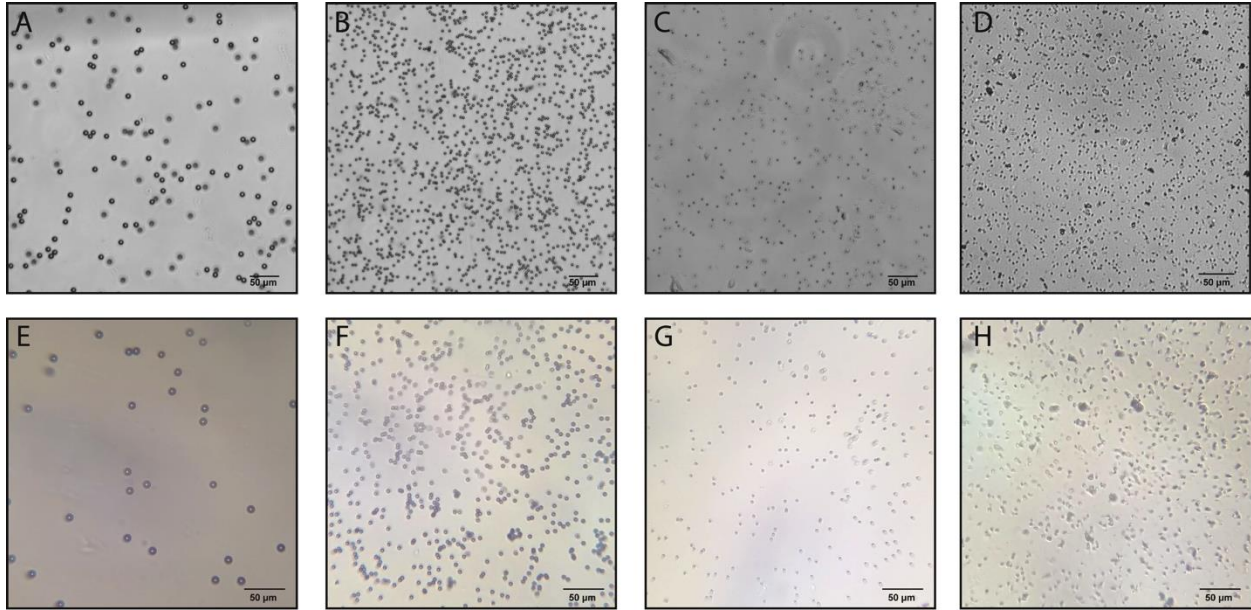

**Fig. S2. Images of microbeads and sperm taken with a laboratory-based microscope and the smartphone-based semen analyzer.** Monochrome images of (A) 10  $\mu\text{m}$ , (B) 5  $\mu\text{m}$ , (C) 3  $\mu\text{m}$  polystyrene beads, and (D) sperm taken with a desktop microscope (Observer D1, Zeiss) with a 10 $\times$  objective. Color images of (E) 10  $\mu\text{m}$ , (F) 5  $\mu\text{m}$ , (G) 3  $\mu\text{m}$  polystyrene beads, and (H) sperm taken with the smartphone-based semen analyzer.

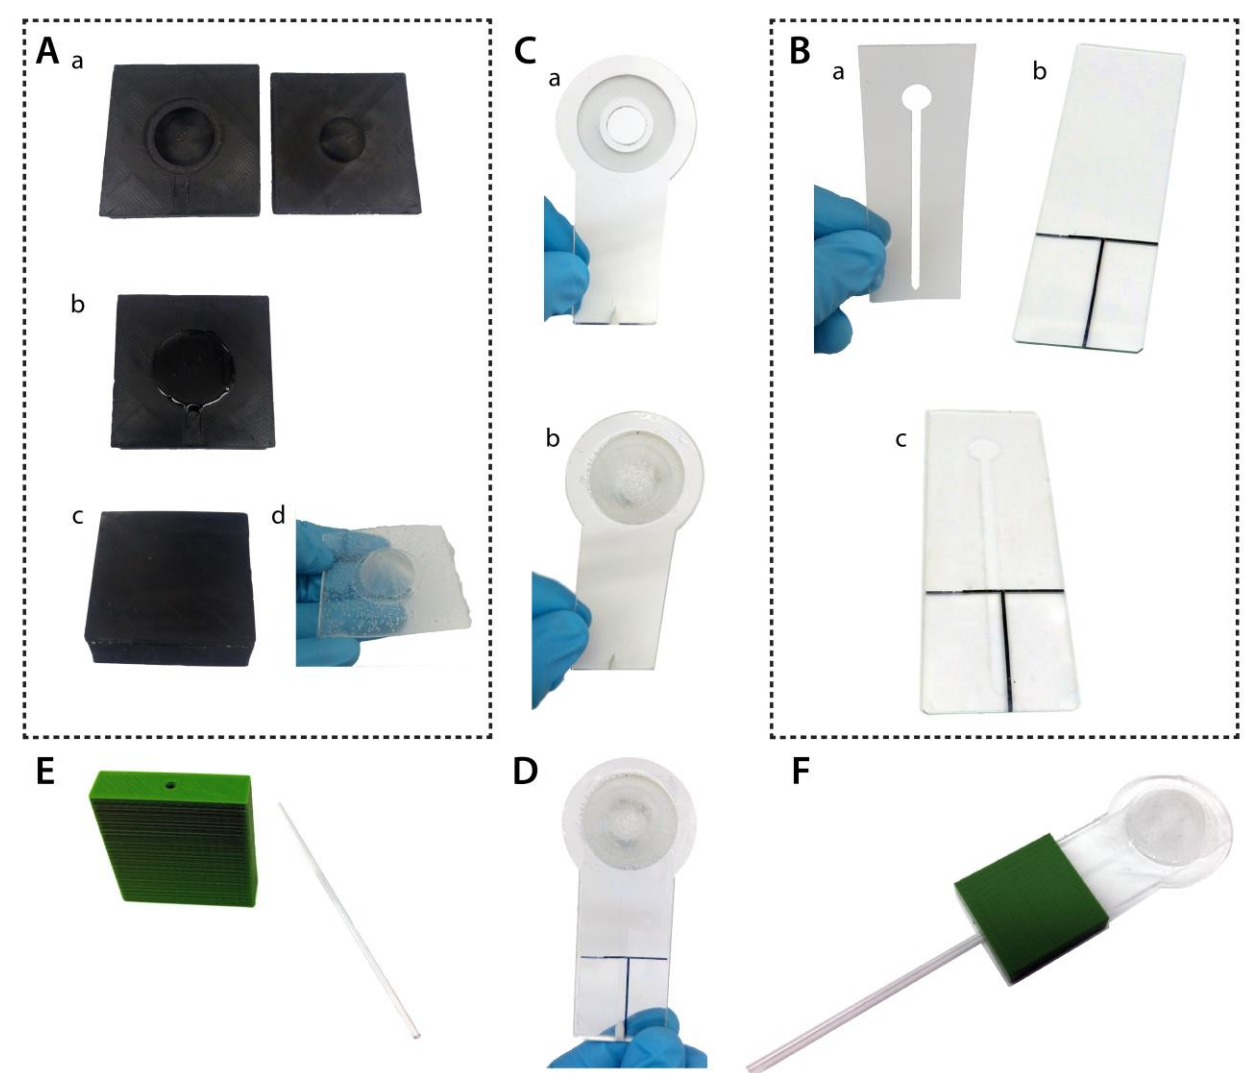

**Fig. S3. Process flow of microchip fabrication.** (A) Microchip bulb fabrication using PDMS and a 3D printed plastic mold. a) Molds are made by 3D printing ABS to produce a negative and a positive mask. b) The pre-polymer and curing agent are mixed (10:1). c) The positive is placed in the cavity and heated in an oven ( $60^{\circ}$  C) for 30 minutes. d) The cured polymer is immediately removed once it has formed. (B) The glass and DSA substrates. a) DSA layer was cut using a laser cutter. b) A regular glass slide was used as one of the substrates. c) The protective thin plastic layer on one side of the DSA was removed, and the DSA was attached to the glass slide. (C) The PMMA substrate and rubber bulb for power-free pumping. a) PMMA was cut and engraved with a laser cutter. The opposite end of the PMMA from the PDMS bulb was engraved to create an inlet for the capillary tube. b) The bulb was attached to the cut PMMA with PDMS. (D) The microchip is completed when (C.b) and (B.c) are attached together. (E) Image of the 3D printed extender and the disposable capillary tip. (F) Image of the actual microchip with the

PDMS bulb. For this design, an extender was 3D printed, a plastic capillary tube was attached to it, the chip inlet was covered with a latex fabric, and a notch was made on the bulb.



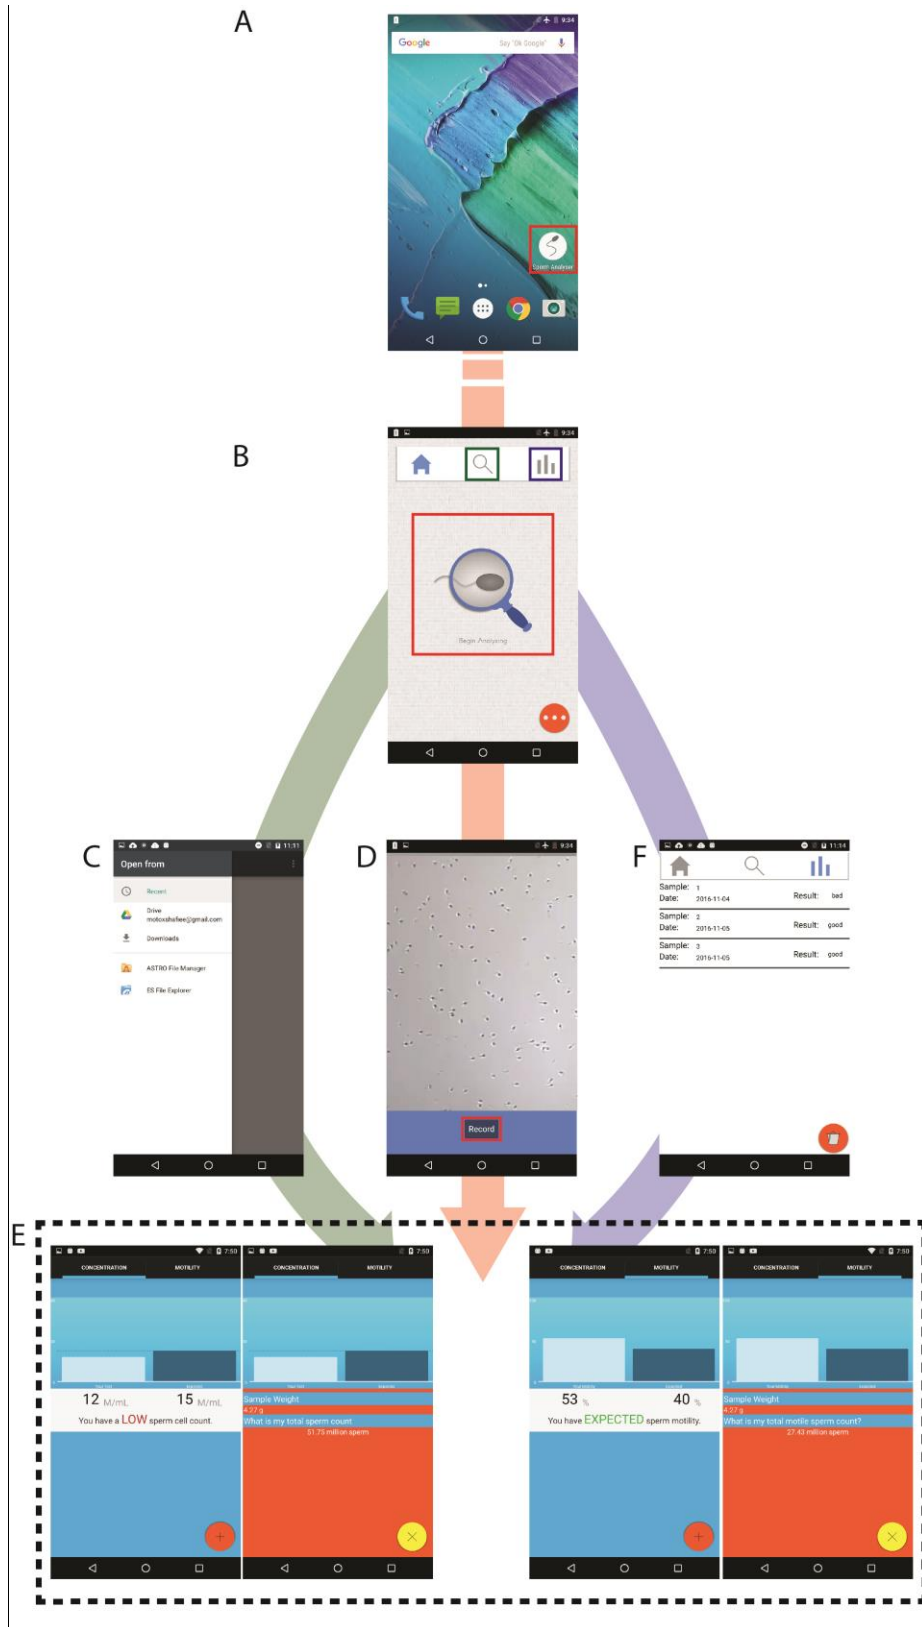

**Fig. S4. Smartphone application flow.** The schematic shows the process flow of the Android application developed for the smartphone-based semen analyzer. (A) The smartphone application can be selected on the home

screen of the cellphone. The smartphone application icon is shown within the red box in this figure. (B) The home screen of the application shows where the different navigation options can be accessed. The schematic has been color coded to show the different possibilities. Green option leads to (C), where pre-recorded videos can be analyzed. (D) The application allows the smartphone camera to get real time access to the sample. It records and analyzes the semen sample and yields the results. The button also accesses the miniaturized weight scale via Bluetooth for semen sample volume measurement. (E) The user will first receive a simple qualitative (positive/negative) result based on the measured values for sperm concentration and motility. The patient will receive one of the following qualitative result reports: (i) You have normal sperm count and motility; (ii) You have low sperm count; (iii) You have low sperm motility; (iv) You have low sperm count and motility. Message (i) is related to negative semen samples and messages (ii, iii, and iv) are related to positive semen samples. Quantitative results for sperm concentration and motility of the sample can also be seen. Additional information can be accessed by pressing the '+' button. The sample weight and the total sperm and total motile sperm count are provided. The blue option leads to (F) where one can access the test result history.

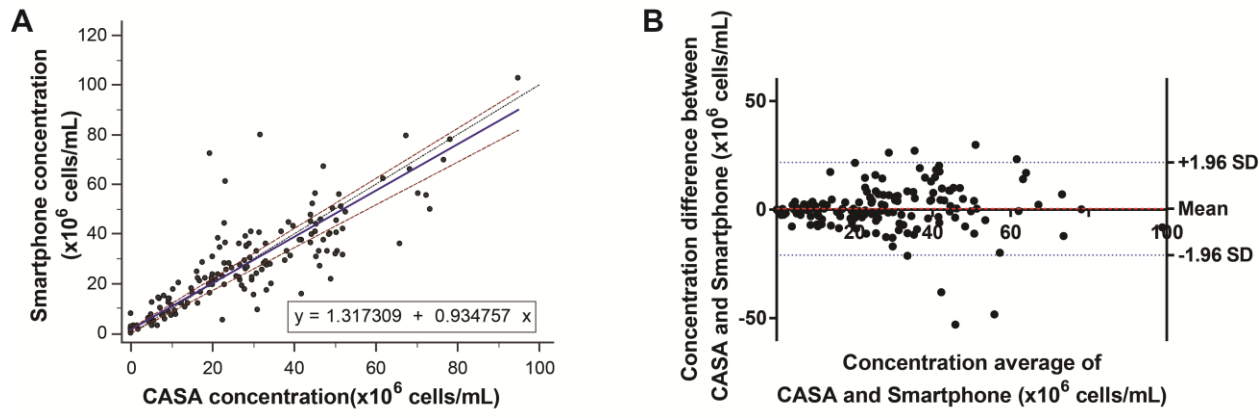

**Fig. S5. Device performance for samples with concentrations below 100 million sperm/ml.** (A) Passing-Bablok and (B) Bland-Altman analysis to compare sperm concentration measurement results obtained from the smartphone-based semen analyzer and CASA for patient samples with sperm concentrations below 100 million sperm/mL (n=156). The solid blue line represents the regression line, the dotted black line represents the identity line, and the two dotted red lines represent the regression line's confidence band in the Passing-Bablok figure (A). The red dotted line in the Bland-Altman figure (B) is the mean difference of the methods, and the blue dotted lines represent the 95% limits of agreement.

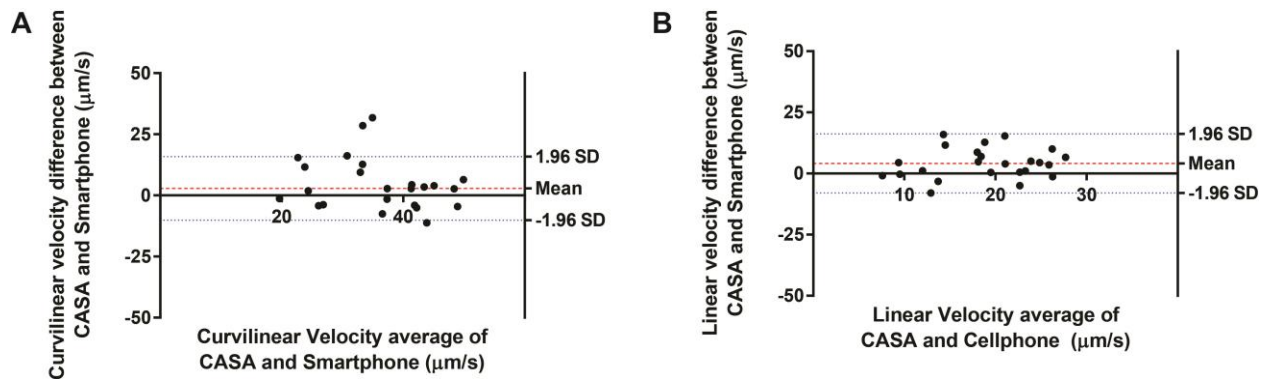

**Fig. S6. Bland-Altman analysis for the measurement of sperm curvilinear (VCL) and linear velocities (VSL).** (A) Comparison of sperm VCL measured by CASA and the smartphone-based semen analyzer (n=24). The mean bias and standard deviation were 4.618 and 10.63, respectively, with the limits of agreement ranging between -16.22 and 25.46. (B) Comparison of sperm VSL measured by CASA and the smartphone-based semen analyzer (n=24). The mean bias and standard deviation were 4.112 and 6.153, respectively, with the limits of agreement ranging

between  $-7.948$  and  $16.17$ . The red dotted line is the mean difference of the methods, and the blue dotted lines represent the 95% limits of agreement in both figures. Two data points from the original data set were eliminated from the analysis as outliers.

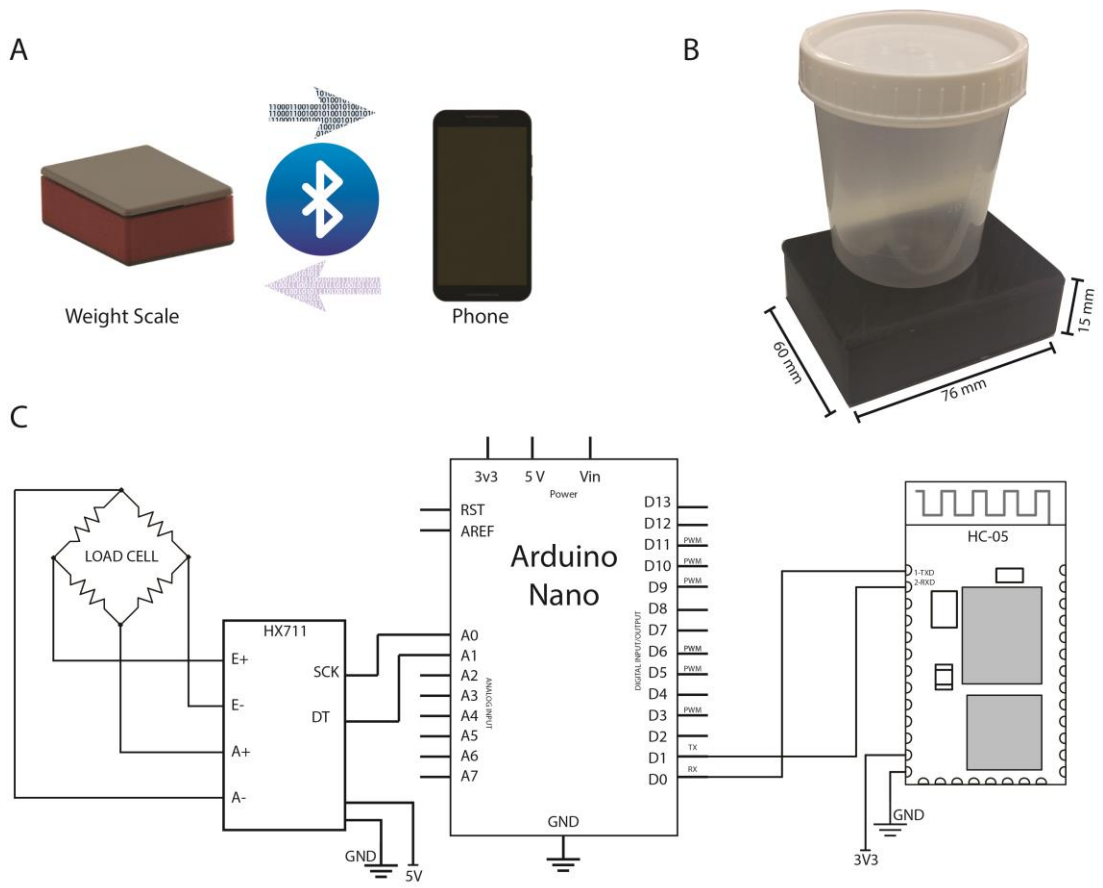

**Fig. S7. Weight scale schematic and design.** (A) The schematic represents the weight scale and its communication with the smartphone through a Bluetooth connection. It can send data to the smartphone and be controlled wirelessly. (B) An actual image of the 3D printed wireless weight scale with a standard collection cup as reference. (C) A circuit diagram of the weight scale and its components.

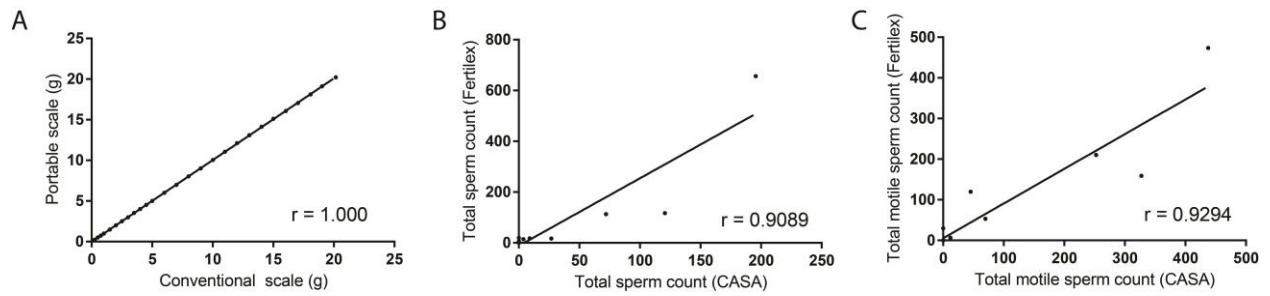

**Fig. S8. Weight scale performance in estimating the total count and total motile count.** (A) The linear correlation between the smartphone-based weight scale module and a conventional laboratory-based weight scale (EP64 Explorer Pro, Ohaus) on measuring the weight of water samples in microtubes ( $n=27$ ). The total sperm count (B) and total motile sperm count (C) of semen samples measured by the smartphone-based platform and CASA were compared ( $n=14$ ). The Pearson's correlation coefficient calculated showed high agreement.

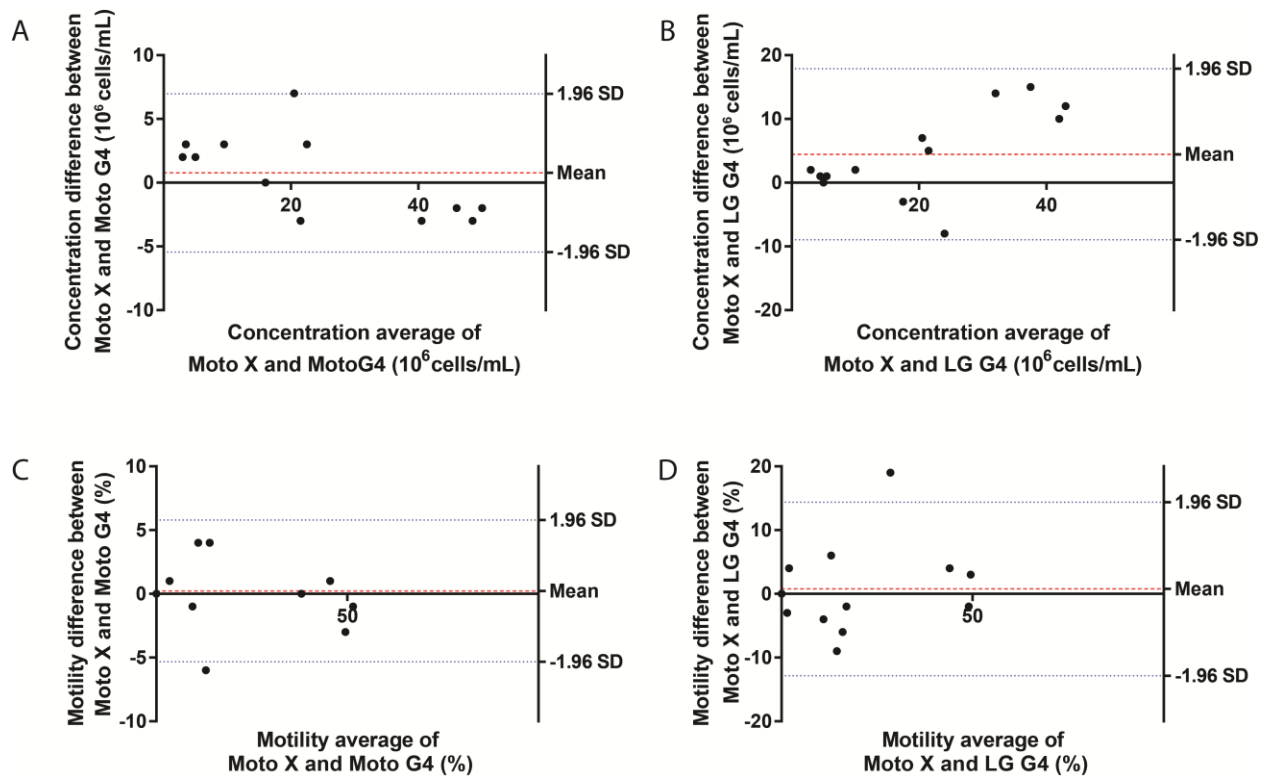

**Fig. S9. Bland-Altman analysis of the three phones.** Bland-Altman analysis on the sperm concentration measurement results obtained using Moto G4 (A) and LG G4 (B) compared to the results obtained by Moto X ( $n=13$ ). Bland-Altman analysis on the sperm motility measurement results obtained using Moto G4 (C) and LG G4 (D).

(D) compared to the results obtained by Moto X (n=13). The red dotted line is the mean difference of the smartphones, and the blue dotted lines represent the 95% limits of agreement in the Bland-Altman figures.

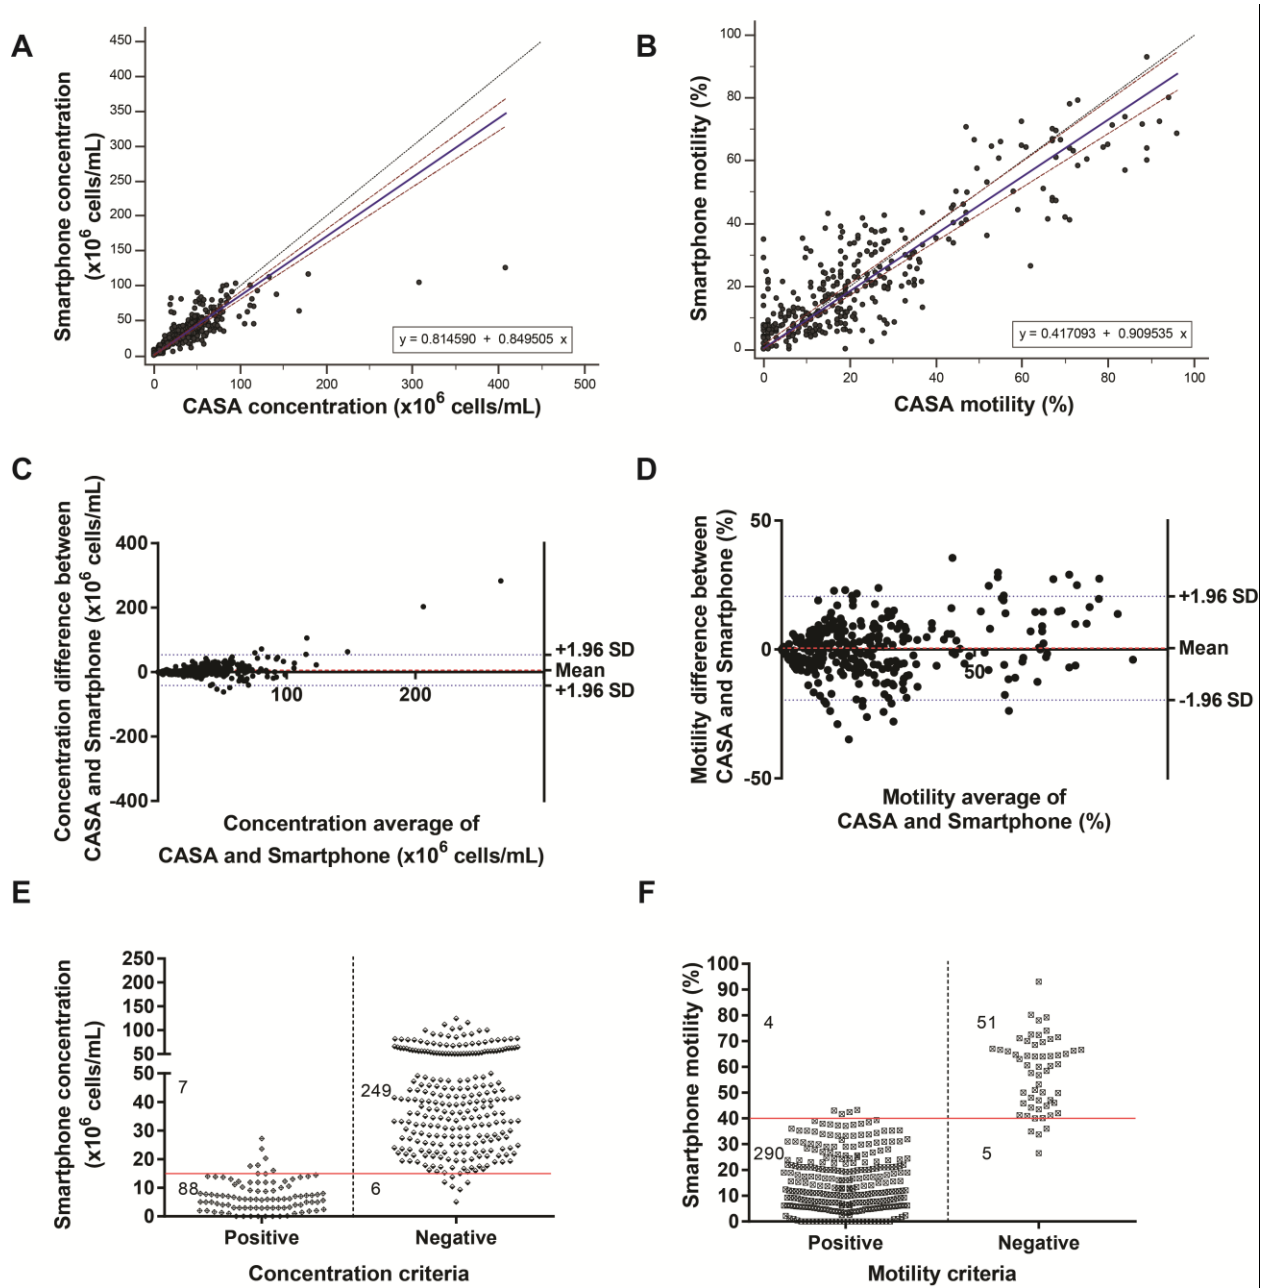

**Fig. S10. Overall agreement and diagnostic performance of the smartphone-based semen analyzer.** Passing-Bablok analysis to compare (A) sperm concentration and (B) motility as measured by the smartphone-based semen analyzer and CASA for all patient semen samples. The solid blue line represents the regression line, the solid black line represents the identity line, and two dotted red lines represent the confidence band in the Passing-Bablok

figures. Bland-Altman analysis to compare (C) sperm concentration and (D) sperm motility as measured by the smartphone-based semen analyzer and CASA for all patient semen samples. The red dotted line in the Bland-Altman figures is the mean difference of the methods, and the blue dotted lines represent the 95% limits of agreement. Scatter plots (E) and (F) represent the qualitative performance of the device in measuring sperm concentration and motility, respectively. The solid red lines represent the threshold values for each criterion. The positive and negative in (E) represent sperm concentration below and above 15 million sperm/mL measured by CASA, respectively. The positive and negative in (F) represent sperm motility below and above 40% measured by CASA, respectively.

### Steps of operation of the smartphone-based device

- (i) Wait for 20 minutes for semen sample liquefaction at room temperature.
- (ii) Load the disposable device with the sample.

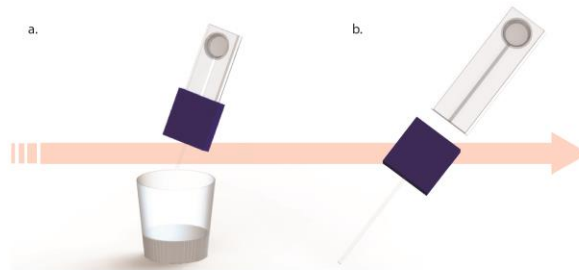

- a) Press the rubber bulb and insert the disposable device's tip into the sample cup. Release the rubber bulb to draw the sample into the microchip.
  - b) Discard the disposable capillary tip by pulling it off the microchip.
- (iii) Attach the optical hardware accessory to the smartphone and insert the disposable device into the opening slot of the cellphone accessory.

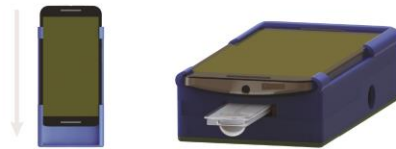

- (iv) Initialize the smartphone application, select the magnifying glass on the screen, and click "Record". The semen analysis results will appear on the screen of the smartphone.

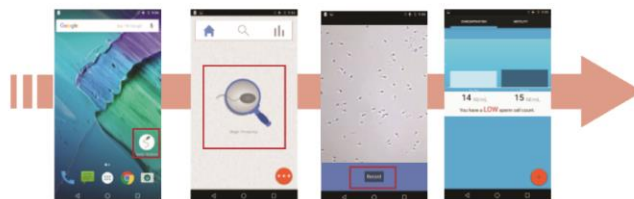

**Fig. S11. Steps of operation for semen testing using the smartphone-based semen analyzer.** The above figure is a replica of the instructions provided to the untrained users.



*Material costs*

| <i>Item</i>                         | <b>Cost (USD)</b> | <b>Total (USD)</b> |
|-------------------------------------|-------------------|--------------------|
| <b><i>3D printed attachment</i></b> |                   | <b>3.59</b>        |
| <i>Lenses</i>                       | 1                 |                    |
| <i>Polylactic filament</i>          | 1.2               |                    |
| <i>LED</i>                          | 0.09              |                    |
| <i>Battery</i>                      | 0.6               |                    |
| <i>Wires and switches</i>           | 0.7               |                    |
|                                     |                   |                    |
| <b><i>Microchip</i></b>             |                   | <b>0.86035</b>     |
| <i>PMMA</i>                         | 0.175             |                    |
| <i>DSA</i>                          | 0.00035           |                    |
| <i>PDMS bulb</i>                    | 0.1               |                    |
| <i>Polylactic filament</i>          | 0.025             |                    |
| <i>Glass slide</i>                  | 0.17              |                    |
| <i>Capillary Tip</i>                | 0.39              |                    |
|                                     |                   |                    |
| <b><i>Total</i></b>                 |                   | <b>4.45035</b>     |

**Table S1. Table of costs.** Manufacturing material costs for hardware attachment and microchip to perform one semen analysis with the smartphone-based semen analyzer. These estimations were calculated based on retail pricing of the materials.

*Sample processing times (seconds)*

|                  |    |                   |    |                   |   |                   |   |                   |   |
|------------------|----|-------------------|----|-------------------|---|-------------------|---|-------------------|---|
| <i>Sample 1</i>  | 10 | <i>Sample 81</i>  | 6  | <i>Sample 161</i> | 0 | <i>Sample 241</i> | 3 | <i>Sample 321</i> | 2 |
| <i>Sample 2</i>  | 1  | <i>Sample 82</i>  | 1  | <i>Sample 162</i> | 0 | <i>Sample 242</i> | 6 | <i>Sample 322</i> | 2 |
| <i>Sample 3</i>  | 7  | <i>Sample 83</i>  | 1  | <i>Sample 163</i> | 0 | <i>Sample 243</i> | 3 | <i>Sample 323</i> | 1 |
| <i>Sample 4</i>  | 3  | <i>Sample 84</i>  | 1  | <i>Sample 164</i> | 0 | <i>Sample 244</i> | 3 | <i>Sample 324</i> | 2 |
| <i>Sample 5</i>  | 1  | <i>Sample 85</i>  | 0  | <i>Sample 165</i> | 1 | <i>Sample 245</i> | 3 | <i>Sample 325</i> | 1 |
| <i>Sample 6</i>  | 2  | <i>Sample 86</i>  | 0  | <i>Sample 166</i> | 1 | <i>Sample 246</i> | 3 | <i>Sample 326</i> | 2 |
| <i>Sample 7</i>  | 2  | <i>Sample 87</i>  | 3  | <i>Sample 167</i> | 1 | <i>Sample 247</i> | 3 | <i>Sample 327</i> | 2 |
| <i>Sample 8</i>  | 1  | <i>Sample 88</i>  | 4  | <i>Sample 168</i> | 2 | <i>Sample 248</i> | 2 | <i>Sample 328</i> | 1 |
| <i>Sample 9</i>  | 2  | <i>Sample 89</i>  | 1  | <i>Sample 169</i> | 2 | <i>Sample 249</i> | 2 | <i>Sample 329</i> | 2 |
| <i>Sample 10</i> | 3  | <i>Sample 90</i>  | 40 | <i>Sample 170</i> | 4 | <i>Sample 250</i> | 3 | <i>Sample 330</i> | 1 |
| <i>Sample 11</i> | 2  | <i>Sample 91</i>  | 1  | <i>Sample 171</i> | 1 | <i>Sample 251</i> | 3 | <i>Sample 331</i> | 2 |
| <i>Sample 12</i> | 3  | <i>Sample 92</i>  | 3  | <i>Sample 172</i> | 1 | <i>Sample 252</i> | 2 | <i>Sample 332</i> | 1 |
| <i>Sample 13</i> | 2  | <i>Sample 93</i>  | 4  | <i>Sample 173</i> | 1 | <i>Sample 253</i> | 3 | <i>Sample 333</i> | 2 |
| <i>Sample 14</i> | 1  | <i>Sample 94</i>  | 3  | <i>Sample 174</i> | 3 | <i>Sample 254</i> | 3 | <i>Sample 334</i> | 1 |
| <i>Sample 15</i> | 2  | <i>Sample 95</i>  | 22 | <i>Sample 175</i> | 4 | <i>Sample 255</i> | 2 | <i>Sample 335</i> | 1 |
| <i>Sample 16</i> | 3  | <i>Sample 96</i>  | 6  | <i>Sample 176</i> | 4 | <i>Sample 256</i> | 3 | <i>Sample 336</i> | 1 |
| <i>Sample 17</i> | 2  | <i>Sample 97</i>  | 3  | <i>Sample 177</i> | 4 | <i>Sample 257</i> | 5 | <i>Sample 337</i> | 9 |
| <i>Sample 18</i> | 2  | <i>Sample 98</i>  | 1  | <i>Sample 178</i> | 3 | <i>Sample 258</i> | 3 | <i>Sample 338</i> | 1 |
| <i>Sample 19</i> | 2  | <i>Sample 99</i>  | 3  | <i>Sample 179</i> | 3 | <i>Sample 259</i> | 4 | <i>Sample 339</i> | 1 |
| <i>Sample 20</i> | 1  | <i>Sample 100</i> | 4  | <i>Sample 180</i> | 3 | <i>Sample 260</i> | 3 | <i>Sample 340</i> | 2 |
| <i>Sample 21</i> | 3  | <i>Sample 101</i> | 2  | <i>Sample 181</i> | 3 | <i>Sample 261</i> | 2 | <i>Sample 341</i> | 1 |
| <i>Sample 22</i> | 4  | <i>Sample 102</i> | 8  | <i>Sample 182</i> | 2 | <i>Sample 262</i> | 3 | <i>Sample 342</i> | 1 |
| <i>Sample 23</i> | 3  | <i>Sample 103</i> | 6  | <i>Sample 183</i> | 2 | <i>Sample 263</i> | 2 | <i>Sample 343</i> | 2 |
| <i>Sample 24</i> | 1  | <i>Sample 104</i> | 1  | <i>Sample 184</i> | 2 | <i>Sample 264</i> | 2 | <i>Sample 344</i> | 1 |
| <i>Sample 25</i> | 2  | <i>Sample 105</i> | 3  | <i>Sample 185</i> | 3 | <i>Sample 265</i> | 2 | <i>Sample 345</i> | 1 |
| <i>Sample 26</i> | 6  | <i>Sample 106</i> | 3  | <i>Sample 186</i> | 3 | <i>Sample 266</i> | 4 | <i>Sample 346</i> | 1 |
| <i>Sample 27</i> | 5  | <i>Sample 107</i> | 2  | <i>Sample 187</i> | 3 | <i>Sample 267</i> | 5 | <i>Sample 347</i> | 3 |
| <i>Sample 28</i> | 14 | <i>Sample 108</i> | 3  | <i>Sample 188</i> | 4 | <i>Sample 268</i> | 3 | <i>Sample 348</i> | 1 |

|                  |    |                   |    |                   |   |                   |   |                   |   |
|------------------|----|-------------------|----|-------------------|---|-------------------|---|-------------------|---|
| <i>Sample 29</i> | 15 | <i>Sample 109</i> | 3  | <i>Sample 189</i> | 2 | <i>Sample 269</i> | 3 | <i>Sample 349</i> | 1 |
| <i>Sample 30</i> | 8  | <i>Sample 110</i> | 4  | <i>Sample 190</i> | 2 | <i>Sample 270</i> | 4 | <i>Sample 350</i> | 1 |
| <i>Sample 31</i> | 4  | <i>Sample 111</i> | 5  | <i>Sample 191</i> | 1 | <i>Sample 271</i> | 3 |                   |   |
| <i>Sample 32</i> | 6  | <i>Sample 112</i> | 14 | <i>Sample 192</i> | 6 | <i>Sample 272</i> | 2 |                   |   |
| <i>Sample 33</i> | 17 | <i>Sample 113</i> | 8  | <i>Sample 193</i> | 1 | <i>Sample 273</i> | 3 |                   |   |
| <i>Sample 34</i> | 14 | <i>Sample 114</i> | 4  | <i>Sample 194</i> | 5 | <i>Sample 274</i> | 3 |                   |   |
| <i>Sample 35</i> | 8  | <i>Sample 115</i> | 2  | <i>Sample 195</i> | 1 | <i>Sample 275</i> | 2 |                   |   |
| <i>Sample 36</i> | 7  | <i>Sample 116</i> | 20 | <i>Sample 196</i> | 1 | <i>Sample 276</i> | 2 |                   |   |
| <i>Sample 37</i> | 6  | <i>Sample 117</i> | 3  | <i>Sample 197</i> | 1 | <i>Sample 277</i> | 3 |                   |   |
| <i>Sample 38</i> | 3  | <i>Sample 118</i> | 7  | <i>Sample 198</i> | 1 | <i>Sample 278</i> | 2 |                   |   |
| <i>Sample 39</i> | 7  | <i>Sample 119</i> | 2  | <i>Sample 199</i> | 3 | <i>Sample 279</i> | 4 |                   |   |
| <i>Sample 40</i> | 4  | <i>Sample 120</i> | 17 | <i>Sample 200</i> | 4 | <i>Sample 280</i> | 5 |                   |   |
| <i>Sample 41</i> | 3  | <i>Sample 121</i> | 10 | <i>Sample 201</i> | 3 | <i>Sample 281</i> | 3 |                   |   |
| <i>Sample 42</i> | 3  | <i>Sample 122</i> | 2  | <i>Sample 202</i> | 4 | <i>Sample 282</i> | 3 |                   |   |
| <i>Sample 43</i> | 3  | <i>Sample 123</i> | 7  | <i>Sample 203</i> | 2 | <i>Sample 283</i> | 2 |                   |   |
| <i>Sample 44</i> | 2  | <i>Sample 124</i> | 1  | <i>Sample 204</i> | 2 | <i>Sample 284</i> | 4 |                   |   |
| <i>Sample 45</i> | 4  | <i>Sample 125</i> | 2  | <i>Sample 205</i> | 2 | <i>Sample 285</i> | 2 |                   |   |
| <i>Sample 46</i> | 3  | <i>Sample 126</i> | 4  | <i>Sample 206</i> | 3 | <i>Sample 286</i> | 3 |                   |   |
| <i>Sample 47</i> | 4  | <i>Sample 127</i> | 10 | <i>Sample 207</i> | 2 | <i>Sample 287</i> | 5 |                   |   |
| <i>Sample 48</i> | 3  | <i>Sample 128</i> | 9  | <i>Sample 208</i> | 1 | <i>Sample 288</i> | 3 |                   |   |
| <i>Sample 49</i> | 5  | <i>Sample 129</i> | 14 | <i>Sample 209</i> | 3 | <i>Sample 289</i> | 3 |                   |   |
| <i>Sample 50</i> | 42 | <i>Sample 130</i> | 2  | <i>Sample 210</i> | 2 | <i>Sample 290</i> | 2 |                   |   |
| <i>Sample 51</i> | 7  | <i>Sample 131</i> | 7  | <i>Sample 211</i> | 2 | <i>Sample 291</i> | 2 |                   |   |
| <i>Sample 52</i> | 11 | <i>Sample 132</i> | 3  | <i>Sample 212</i> | 1 | <i>Sample 292</i> | 2 |                   |   |
| <i>Sample 53</i> | 7  | <i>Sample 133</i> | 13 | <i>Sample 213</i> | 2 | <i>Sample 293</i> | 2 |                   |   |
| <i>Sample 54</i> | 6  | <i>Sample 134</i> | 6  | <i>Sample 214</i> | 1 | <i>Sample 294</i> | 1 |                   |   |
| <i>Sample 55</i> | 3  | <i>Sample 135</i> | 8  | <i>Sample 215</i> | 3 | <i>Sample 295</i> | 4 |                   |   |

|                  |    |                   |    |                   |   |                   |    |  |  |
|------------------|----|-------------------|----|-------------------|---|-------------------|----|--|--|
| <i>Sample 56</i> | 2  | <i>Sample 136</i> | 7  | <i>Sample 216</i> | 3 | <i>Sample 296</i> | 4  |  |  |
| <i>Sample 57</i> | 7  | <i>Sample 137</i> | 1  | <i>Sample 217</i> | 8 | <i>Sample 297</i> | 7  |  |  |
| <i>Sample 58</i> | 6  | <i>Sample 138</i> | 2  | <i>Sample 218</i> | 3 | <i>Sample 298</i> | 3  |  |  |
| <i>Sample 59</i> | 1  | <i>Sample 139</i> | 7  | <i>Sample 219</i> | 3 | <i>Sample 299</i> | 3  |  |  |
| <i>Sample 60</i> | 3  | <i>Sample 140</i> | 11 | <i>Sample 220</i> | 3 | <i>Sample 300</i> | 3  |  |  |
| <i>Sample 61</i> | 9  | <i>Sample 141</i> | 7  | <i>Sample 221</i> | 4 | <i>Sample 301</i> | 2  |  |  |
| <i>Sample 62</i> | 13 | <i>Sample 142</i> | 5  | <i>Sample 222</i> | 3 | <i>Sample 302</i> | 2  |  |  |
| <i>Sample 63</i> | 12 | <i>Sample 143</i> | 1  | <i>Sample 223</i> | 1 | <i>Sample 303</i> | 2  |  |  |
| <i>Sample 64</i> | 9  | <i>Sample 144</i> | 20 | <i>Sample 224</i> | 2 | <i>Sample 304</i> | 4  |  |  |
| <i>Sample 65</i> | 11 | <i>Sample 145</i> | 6  | <i>Sample 225</i> | 2 | <i>Sample 305</i> | 2  |  |  |
| <i>Sample 66</i> | 12 | <i>Sample 146</i> | 10 | <i>Sample 226</i> | 2 | <i>Sample 306</i> | 2  |  |  |
| <i>Sample 67</i> | 16 | <i>Sample 147</i> | 4  | <i>Sample 227</i> | 4 | <i>Sample 307</i> | 1  |  |  |
| <i>Sample 68</i> | 15 | <i>Sample 148</i> | 8  | <i>Sample 228</i> | 6 | <i>Sample 308</i> | 1  |  |  |
| <i>Sample 69</i> | 12 | <i>Sample 149</i> | 1  | <i>Sample 229</i> | 2 | <i>Sample 309</i> | 1  |  |  |
| <i>Sample 70</i> | 36 | <i>Sample 150</i> | 6  | <i>Sample 230</i> | 4 | <i>Sample 310</i> | 1  |  |  |
| <i>Sample 71</i> | 14 | <i>Sample 151</i> | 1  | <i>Sample 231</i> | 2 | <i>Sample 311</i> | 1  |  |  |
| <i>Sample 72</i> | 14 | <i>Sample 152</i> | 8  | <i>Sample 232</i> | 6 | <i>Sample 312</i> | 2  |  |  |
| <i>Sample 73</i> | 22 | <i>Sample 153</i> | 8  | <i>Sample 233</i> | 4 | <i>Sample 313</i> | 1  |  |  |
| <i>Sample 74</i> | 22 | <i>Sample 154</i> | 6  | <i>Sample 234</i> | 3 | <i>Sample 314</i> | 5  |  |  |
| <i>Sample 75</i> | 30 | <i>Sample 155</i> | 22 | <i>Sample 235</i> | 1 | <i>Sample 315</i> | 10 |  |  |
| <i>Sample 76</i> | 6  | <i>Sample 156</i> | 12 | <i>Sample 236</i> | 3 | <i>Sample 316</i> | 2  |  |  |
| <i>Sample 77</i> | 6  | <i>Sample 157</i> | 4  | <i>Sample 237</i> | 3 | <i>Sample 317</i> | 4  |  |  |
| <i>Sample 78</i> | 5  | <i>Sample 158</i> | 3  | <i>Sample 238</i> | 2 | <i>Sample 318</i> | 2  |  |  |
| <i>Sample 79</i> | 8  | <i>Sample 159</i> | 8  | <i>Sample 239</i> | 1 | <i>Sample 319</i> | 3  |  |  |
| <i>Sample 80</i> | 12 | <i>Sample 160</i> | 0  | <i>Sample 240</i> | 2 | <i>Sample 320</i> | 1  |  |  |

**Table S2. Processing times for the 350 samples tested by trained and untrained users.** The average time, across all samples, taken for sample processing excluding the image acquisition times (1 s) by the smartphone application

was 4.48 seconds, and the median was 3 seconds. The time was calculated by the smartphone application using the smartphone's internal clock.

**Raw data for cryopreserved semen samples**

| <i>Sample #</i> | <b>Concentration (x10<sup>6</sup> cells/mL)</b> |                      |                      |                      |                      |
|-----------------|-------------------------------------------------|----------------------|----------------------|----------------------|----------------------|
|                 | <b>Hemocytometer</b>                            | <b>Phone average</b> | <b>Measurement 1</b> | <b>Measurement 2</b> | <b>Measurement 3</b> |
| 1               | 3.33E-03                                        | 0.00E+00             | 0.00E+00             | 0.00E+00             | 0.00E+00             |
| 2               | 3.33E-02                                        | 0.00E+00             | 0.00E+00             | 0.00E+00             | 0.00E+00             |
| 3               | 1.71E-01                                        | 2.74E-01             | 3.08E-01             | 3.08E-01             | 2.05E-01             |
| 4               | 2.94E+00                                        | 2.91E+00             | 2.15E+00             | 2.77E+00             | 3.80E+00             |
| 5               | 1.03E-02                                        | 0.00E+00             | 0.00E+00             | 0.00E+00             | 0.00E+00             |
| 6               | 9.23E-02                                        | 1.03E-01             | 1.03E-01             | 1.03E-01             | 1.03E-01             |
| 7               | 1.63E+00                                        | 5.13E-01             | 5.13E-01             | 7.18E-01             | 3.08E-01             |
| 8               | 4.58E+00                                        | 3.56E+00             | 3.39E+00             | 3.69E+00             | 3.59E+00             |
| 9               | 3.85E-03                                        | 1.03E-01             | 1.03E-01             | 1.03E-01             | 1.03E-01             |
| 10              | 7.41E-02                                        | 6.84E-02             | 1.03E-01             | 0.00E+00             | 1.03E-01             |
| 11              | 1.75E+00                                        | 9.58E-01             | 1.03E+00             | 1.03E+00             | 8.21E-01             |
| 12              | 5.59E-02                                        | 0.00E+00             | 0.00E+00             | 0.00E+00             | 0.00E+00             |
| 13              | 4.71E-01                                        | 3.08E-01             | 3.08E-01             | 3.08E-01             | 3.08E-01             |
| 14              | 6.52E+00                                        | 2.15E+00             | 2.15E+00             | 2.15E+00             | 2.15E+00             |
| 15              | 1.09E-01                                        | 3.08E-01             | 3.08E-01             | 3.08E-01             | 3.08E-01             |
| 16              | 1.03E+00                                        | 1.23E+00             | 1.23E+00             | 1.23E+00             | 1.23E+00             |
| 17              | 6.17E+00                                        | 6.02E+00             | 5.75E+00             | 5.95E+00             | 6.36E+00             |
| 18              | 6.71E-02                                        | 0.00E+00             | 0.00E+00             | 0.00E+00             | 0.00E+00             |
| 19              | 3.35E-01                                        | 1.37E-01             | 2.05E-01             | 1.03E-01             | 1.03E-01             |
| 20              | 1.93E+00                                        | 1.40E+00             | 1.44E+00             | 1.54E+00             | 1.23E+00             |
| 21              | 1.19E+01                                        | 1.19E+01             | 1.22E+01             | 1.28E+01             | 1.06E+01             |
| 22              | 1.82E-01                                        | 2.05E-01             | 3.08E-01             | 2.05E-01             | 1.03E-01             |
| 23              | 7.29E-01                                        | 4.79E-01             | 5.13E-01             | 7.18E-01             | 2.05E-01             |

|    |          |          |          |          |          |
|----|----------|----------|----------|----------|----------|
| 24 | 2.50E+00 | 2.57E+00 | 3.18E+00 | 3.18E+00 | 1.33E+00 |
| 25 | 6.53E-01 | 4.79E-01 | 5.13E-01 | 4.10E-01 | 5.13E-01 |
| 26 | 1.96E+00 | 1.37E+00 | 1.44E+00 | 1.44E+00 | 1.23E+00 |
| 27 | 0.00E+00 | 0.00E+00 | 0.00E+00 | 0.00E+00 | 0.00E+00 |
| 28 | 6.82E-02 | 2.05E-01 | 1.03E-01 | 3.08E-01 | 2.05E-01 |
| 29 | 1.08E+00 | 6.16E-01 | 6.16E-01 | 7.18E-01 | 5.13E-01 |
| 30 | 7.48E+00 | 4.41E+00 | 5.44E+00 | 4.00E+00 | 3.80E+00 |
| 31 | 4.44E-02 | 0.00E+00 | 0.00E+00 | 0.00E+00 | 0.00E+00 |
| 32 | 1.67E-01 | 1.71E-01 | 1.03E-01 | 2.05E-01 | 2.05E-01 |
| 33 | 7.65E-01 | 2.39E-01 | 5.13E-01 | 1.03E-01 | 1.03E-01 |
| 34 | 5.46E+00 | 3.45E+00 | 3.59E+00 | 3.69E+00 | 3.08E+00 |
| 35 | 4.17E-02 | 6.84E-02 | 0.00E+00 | 2.05E-01 | 0.00E+00 |
| 36 | 3.75E-01 | 1.71E-01 | 1.03E-01 | 2.05E-01 | 2.05E-01 |
| 37 | 1.27E+00 | 1.27E+00 | 1.23E+00 | 1.33E+00 | 1.23E+00 |
| 38 | 5.79E+00 | 2.60E+00 | 2.15E+00 | 3.49E+00 | 2.15E+00 |
| 39 | 6.82E-02 | 0.00E+00 | 0.00E+00 | 0.00E+00 | 0.00E+00 |
| 40 | 3.96E-01 | 4.79E-01 | 6.16E-01 | 4.10E-01 | 4.10E-01 |
| 41 | 1.40E+00 | 4.10E-01 | 5.13E-01 | 3.08E-01 | 4.10E-01 |
| 42 | 4.07E+00 | 2.02E+00 | 1.33E+00 | 2.87E+00 | 1.85E+00 |
| 43 | 4.17E-02 | 0.00E+00 | 0.00E+00 | 0.00E+00 | 0.00E+00 |
| 44 | 3.33E-01 | 2.05E-01 | 3.08E-01 | 2.05E-01 | 1.03E-01 |
| 45 | 1.15E+00 | 1.09E+00 | 8.21E-01 | 1.23E+00 | 1.23E+00 |
| 46 | 4.77E+00 | 5.81E+00 | 5.85E+00 | 5.54E+00 | 6.05E+00 |
| 47 | 3.23E+01 | 3.21E+01 | 3.20E+01 | 3.22E+01 | 3.22E+01 |
| 48 | 3.76E+01 | 4.22E+01 | 4.19E+01 | 4.23E+01 | 4.23E+01 |
| 49 | 3.18E+01 | 3.41E+01 | 3.43E+01 | 3.40E+01 | 3.40E+01 |
| 50 | 3.18E+01 | 2.72E+01 | 2.79E+01 | 2.68E+01 | 2.68E+01 |
| 51 | 2.91E+01 | 2.91E+01 | 2.91E+01 | 2.92E+01 | 2.92E+01 |
| 52 | 3.49E+01 | 2.72E+01 | 2.73E+01 | 2.72E+01 | 2.72E+01 |

|    |          |          |          |          |          |
|----|----------|----------|----------|----------|----------|
| 53 | 3.34E+01 | 2.66E+01 | 2.66E+01 | 2.65E+01 | 2.65E+01 |
| 54 | 4.50E+01 | 4.67E+01 | 4.63E+01 | 4.69E+01 | 4.70E+01 |
| 55 | 3.92E+01 | 4.76E+01 | 4.76E+01 | 4.76E+01 | 4.76E+01 |
| 56 | 3.28E+01 | 5.97E+01 | 5.91E+01 | 6.00E+01 | 6.00E+01 |

**Table S3. Raw data of cryopreserved samples collected for measuring sperm concentration.** The values reported under ‘phone average’ are the average of measurements 1, 2, and 3. The average of the coefficient of variation between these repeated measurements was 4.47%.

*Raw patient data (trained users)*

| <i>SAMPLE #</i> | <b>Total motility (%)</b> |       | <b>Concentration (x10<sup>6</sup> cells/mL)</b> |        | <b>Curvilinear velocity (µm/s)</b> |       | <b>Linear velocity (µm/s)</b> |       | <b>Time (s)</b> |
|-----------------|---------------------------|-------|-------------------------------------------------|--------|------------------------------------|-------|-------------------------------|-------|-----------------|
|                 | CASA                      | Phone | CASA                                            | Phone  | CASA                               | Phone | CASA                          | Phone | Phone           |
| 1               | 9.00                      | 35.21 | 307.60                                          | 104.77 | 23.95                              | 28.20 | 12.10                         | 15.30 | 10              |
| 2               | 18.00                     | 17.11 | 5.20                                            | 12.20  | 38.90                              | 22.65 | 20.50                         | 15.72 | 1               |
| 3               | 53.00                     | 64.56 | 408.00                                          | 124.74 | 39.70                              | 44.72 | 23.80                         | 22.76 | 7               |
| 4               | 6.00                      | 12.00 | 41.90                                           | 37.44  | 19.00                              | 20.25 | 9.35                          | 9.65  | 3               |
| 5               | 67.00                     | 47.14 | 6.50                                            | 2.88   | 36.55                              | 38.13 | 21.90                         | 14.95 | 1               |
| 6               | 6.00                      | 5.56  | 11.00                                           | 7.35   | 30.40                              | 14.94 | 11.60                         | 7.16  | 2               |
| 7               | 52.00                     | 36.00 | 9.40                                            | 13.85  | 32.80                              | 40.34 | 19.70                         | 19.27 | 2               |
| 8               | 10.00                     | 11.29 | 6.90                                            | 13.73  | 47.60                              | 19.06 | 20.30                         | 8.66  | 1               |
| 9               | 2.00                      | 6.25  | 7.80                                            | 8.03   | 25.30                              | 23.42 | 12.55                         | 11.43 | 2               |
| 10              | 0.00                      | 13.85 | 38.70                                           | 44.73  | 0.00                               | 23.62 | 0.00                          | 13.05 | 3               |
| 11              | 73.00                     | 79.24 | 134.10                                          | 111.86 | 38.25                              | 49.49 | 25.60                         | 26.93 | 2               |
| 12              | 68.00                     | 69.62 | 178.90                                          | 115.88 | 46.65                              | 51.23 | 31.00                         | 24.37 | 3               |
| 13              | 37.00                     | 13.16 | 5.70                                            | 5.04   | 49.70                              | 47.03 | 28.70                         | 13.36 | 2               |

|    |       |       |        |       |       |       |       |       |    |
|----|-------|-------|--------|-------|-------|-------|-------|-------|----|
| 14 | 75.00 | 60.36 | 142.30 | 87.59 | 47.05 | 43.09 | 27.65 | 24.08 | 1  |
| 15 | 61.00 | 64.22 | 67.50  | 79.63 | 39.85 | 43.92 | 22.95 | 22.40 | 2  |
| 16 | 44.00 | 33.83 | 28.30  | 34.69 | 45.15 | 41.70 | 20.20 | 25.14 | 3  |
| 17 | 35.00 | 20.62 | 27.90  | 29.29 | 37.65 | 28.20 | 22.35 | 13.64 | 2  |
| 18 | 3.00  | 6.31  | 23.40  | 25.42 | 50.85 | 19.04 | 22.25 | 6.31  | 2  |
| 19 | 1.00  | 0.00  | 27.80  | 17.66 | 92.50 | 21.44 | 44.30 | 9.96  | 2  |
| 20 | 6.00  | 4.76  | 4.30   | 6.03  | 29.60 | 18.00 | 7.15  | 8.04  | 1  |
| 21 | 66.00 | 41.30 | 116.00 | 70.07 | 43.60 | 39.23 | 26.40 | 21.39 | 3  |
| 22 | 81.00 | 71.15 | 77.90  | 91.95 | 53.15 | 46.66 | 31.25 | 21.22 | 4  |
| 23 | 11.00 | 19.71 | 23.20  | 61.23 | 24.95 | 28.74 | 8.90  | 16.90 | 3  |
| 24 | 71.00 | 41.13 | 9.30   | 8.76  | 42.70 | 39.91 | 23.05 | 19.08 | 1  |
| 25 | 35.00 | 20.14 | 24.10  | 27.97 | 39.65 | 26.97 | 25.20 | 12.44 | 2  |
| 26 | 68.00 | 47.08 | 168.70 | 62.74 | 38.75 | 36.00 | 27.05 | 22.63 | 6  |
| 27 | 16.00 | 17.43 | 4.50   | 4.48  | N/A   | N/A   | N/A   | N/A   | 5  |
| 28 | 8.00  | 15.94 | 30.80  | 33.17 | N/A   | N/A   | N/A   | N/A   | 14 |
| 29 | 9.00  | 10.41 | 27.30  | 19.05 | N/A   | N/A   | N/A   | N/A   | 15 |
| 30 | 12.00 | 5.82  | 30.90  | 9.33  | N/A   | N/A   | N/A   | N/A   | 8  |
| 31 | 8.00  | 5.17  | 16.50  | 11.83 | N/A   | N/A   | N/A   | N/A   | 4  |
| 32 | 52.00 | 53.22 | 37.70  | 29.26 | N/A   | N/A   | N/A   | N/A   | 6  |
| 33 | 3.00  | 3.40  | 34.30  | 19.93 | N/A   | N/A   | N/A   | N/A   | 17 |
| 34 | 28.00 | 5.00  | 20.10  | 23.61 | N/A   | N/A   | N/A   | N/A   | 14 |
| 35 | 25.00 | 2.20  | 22.40  | 5.07  | N/A   | N/A   | N/A   | N/A   | 8  |
| 36 | 7.00  | 18.00 | 13.90  | 11.89 | N/A   | N/A   | N/A   | N/A   | 7  |



|    |       |       |       |       |     |     |     |     |    |
|----|-------|-------|-------|-------|-----|-----|-----|-----|----|
| 37 | 2.00  | 4.85  | 30.00 | 15.31 | N/A | N/A | N/A | N/A | 6  |
| 38 | 0.00  | 4.14  | 0.00  | 7.80  | N/A | N/A | N/A | N/A | 3  |
| 39 | 18.00 | 24.55 | 46.30 | 27.15 | N/A | N/A | N/A | N/A | 7  |
| 40 | 36.00 | 28.37 | 49.00 | 21.81 | N/A | N/A | N/A | N/A | 4  |
| 41 | 37.00 | 33.28 | 47.30 | 67.19 | N/A | N/A | N/A | N/A | 3  |
| 42 | 6.00  | 11.00 | 5.10  | 6.10  | N/A | N/A | N/A | N/A | 3  |
| 43 | 5.00  | 9.89  | 11.70 | 20.29 | N/A | N/A | N/A | N/A | 3  |
| 44 | 0.00  | 3.88  | 1.70  | 1.34  | N/A | N/A | N/A | N/A | 2  |
| 45 | 23.00 | 5.90  | 9.30  | 12.26 | N/A | N/A | N/A | N/A | 4  |
| 46 | 47.00 | 40.95 | 16.10 | 24.81 | N/A | N/A | N/A | N/A | 3  |
| 47 | 13.00 | 11.73 | 9.20  | 13.71 | N/A | N/A | N/A | N/A | 4  |
| 48 | 3.00  | 0.89  | 33.30 | 17.31 | N/A | N/A | N/A | N/A | 3  |
| 49 | 24.00 | 31.08 | 41.90 | 15.64 | N/A | N/A | N/A | N/A | 5  |
| 50 | 18.00 | 39.00 | 31.70 | 80.00 | N/A | N/A | N/A | N/A | 42 |
| 51 | 20.00 | 33.33 | 29.70 | 21.21 | N/A | N/A | N/A | N/A | 7  |
| 52 | 17.00 | 20.50 | 29.70 | 22.51 | N/A | N/A | N/A | N/A | 11 |
| 53 | 0.33  | 7.35  | 73.20 | 49.93 | N/A | N/A | N/A | N/A | 7  |
| 54 | 0.00  | 1.81  | 21.73 | 34.41 | N/A | N/A | N/A | N/A | 6  |
| 55 | 0.67  | 24.55 | 20.37 | 21.39 | N/A | N/A | N/A | N/A | 3  |
| 56 | 0.00  | 34.88 | 26.77 | 21.23 | N/A | N/A | N/A | N/A | 2  |
| 57 | 0.33  | 2.51  | 46.03 | 33.13 | N/A | N/A | N/A | N/A | 7  |
| 58 | 0.00  | 3.43  | 48.07 | 33.15 | N/A | N/A | N/A | N/A | 6  |
| 59 | 13.67 | 5.32  | 5.13  | 2.99  | N/A | N/A | N/A | N/A | 1  |

|    |       |       |       |        |     |     |     |     |    |
|----|-------|-------|-------|--------|-----|-----|-----|-----|----|
| 60 | 28.67 | 7.82  | 19.97 | 19.50  | N/A | N/A | N/A | N/A | 3  |
| 61 | 47.33 | 49.87 | 50.57 | 33.01  | N/A | N/A | N/A | N/A | 9  |
| 62 | 46.33 | 46.08 | 49.47 | 50.18  | N/A | N/A | N/A | N/A | 13 |
| 63 | 44.00 | 45.89 | 39.83 | 43.20  | N/A | N/A | N/A | N/A | 12 |
| 64 | 43.67 | 44.86 | 43.97 | 47.63  | N/A | N/A | N/A | N/A | 9  |
| 65 | 36.67 | 21.55 | 36.77 | 40.85  | N/A | N/A | N/A | N/A | 11 |
| 66 | 33.67 | 21.17 | 45.13 | 40.90  | N/A | N/A | N/A | N/A | 12 |
| 67 | 44.67 | 50.15 | 44.47 | 52.19  | N/A | N/A | N/A | N/A | 16 |
| 68 | 44.00 | 40.11 | 72.40 | 55.48  | N/A | N/A | N/A | N/A | 15 |
| 69 | 29.00 | 25.60 | 43.97 | 44.82  | N/A | N/A | N/A | N/A | 12 |
| 70 | 54.67 | 60.65 | 94.77 | 102.93 | N/A | N/A | N/A | N/A | 36 |
| 71 | 27.33 | 37.53 | 45.40 | 43.74  | N/A | N/A | N/A | N/A | 14 |
| 72 | 27.33 | 31.71 | 46.43 | 45.88  | N/A | N/A | N/A | N/A | 14 |
| 73 | 34.67 | 30.17 | 76.67 | 69.67  | N/A | N/A | N/A | N/A | 22 |
| 74 | 22.00 | 24.72 | 45.17 | 56.20  | N/A | N/A | N/A | N/A | 22 |
| 75 | 23.67 | 19.95 | 61.77 | 62.39  | N/A | N/A | N/A | N/A | 30 |
| 76 | 24.67 | 33.64 | 48.83 | 40.13  | N/A | N/A | N/A | N/A | 6  |
| 77 | 12.67 | 12.09 | 24.77 | 26.25  | N/A | N/A | N/A | N/A | 6  |
| 78 | 12.33 | 11.09 | 21.40 | 23.63  | N/A | N/A | N/A | N/A | 5  |
| 79 | 17.33 | 11.60 | 20.10 | 30.92  | N/A | N/A | N/A | N/A | 8  |
| 80 | 14.00 | 18.90 | 23.20 | 36.19  | N/A | N/A | N/A | N/A | 12 |
| 81 | 14.33 | 38.56 | 32.13 | 25.53  | N/A | N/A | N/A | N/A | 6  |
| 82 | 7.00  | 13.33 | 0.60  | 2.98   | N/A | N/A | N/A | N/A | 1  |

|     |       |       |       |       |     |     |     |     |    |
|-----|-------|-------|-------|-------|-----|-----|-----|-----|----|
| 83  | 0.00  | 0.00  | 0.00  | 1.81  | N/A | N/A | N/A | N/A | 1  |
| 84  | 0.00  | 0.00  | 0.00  | 0.04  | N/A | N/A | N/A | N/A | 1  |
| 85  | 0.00  | 16.59 | 0.00  | 1.42  | N/A | N/A | N/A | N/A | 0  |
| 86  | 0.00  | 0.00  | 0.00  | 2.44  | N/A | N/A | N/A | N/A | 0  |
| 87  | 62.00 | 26.50 | 22.83 | 19.48 | N/A | N/A | N/A | N/A | 3  |
| 88  | 49.67 | 57.60 | 8.17  | 14.87 | N/A | N/A | N/A | N/A | 4  |
| 89  | 12.00 | 6.22  | 1.53  | 3.16  | N/A | N/A | N/A | N/A | 1  |
| 90  | 25.00 | 29.86 | 19.37 | 72.30 | N/A | N/A | N/A | N/A | 40 |
| 91  | 17.00 | 5.50  | 9.87  | 11.14 | N/A | N/A | N/A | N/A | 1  |
| 92  | 21.67 | 18.61 | 19.87 | 20.62 | N/A | N/A | N/A | N/A | 3  |
| 93  | 30.33 | 8.65  | 33.93 | 27.66 | N/A | N/A | N/A | N/A | 4  |
| 94  | 4.33  | 7.58  | 28.10 | 25.72 | N/A | N/A | N/A | N/A | 3  |
| 95  | 16.33 | 22.74 | 51.07 | 55.89 | N/A | N/A | N/A | N/A | 22 |
| 96  | 18.33 | 37.13 | 70.23 | 56.15 | N/A | N/A | N/A | N/A | 6  |
| 97  | 12.00 | 4.27  | 8.23  | 5.78  | N/A | N/A | N/A | N/A | 3  |
| 98  | 18.67 | 6.07  | 13.87 | 11.93 | N/A | N/A | N/A | N/A | 1  |
| 99  | 12.33 | 11.27 | 19.80 | 22.19 | N/A | N/A | N/A | N/A | 3  |
| 100 | 14.33 | 11.76 | 65.90 | 36.08 | N/A | N/A | N/A | N/A | 4  |
| 101 | 9.67  | 7.75  | 19.30 | 15.94 | N/A | N/A | N/A | N/A | 2  |
| 102 | 19.67 | 21.33 | 50.37 | 40.33 | N/A | N/A | N/A | N/A | 8  |
| 103 | 10.67 | 10.61 | 17.47 | 28.50 | N/A | N/A | N/A | N/A | 6  |
| 104 | 22.33 | 29.96 | 7.23  | 10.28 | N/A | N/A | N/A | N/A | 1  |
| 105 | 10.00 | 31.92 | 19.00 | 19.40 | N/A | N/A | N/A | N/A | 3  |

|     |       |       |       |       |     |     |     |     |    |
|-----|-------|-------|-------|-------|-----|-----|-----|-----|----|
| 106 | 1.00  | 21.13 | 33.17 | 27.40 | N/A | N/A | N/A | N/A | 3  |
| 107 | 11.00 | 30.97 | 26.50 | 22.44 | N/A | N/A | N/A | N/A | 2  |
| 108 | 15.33 | 7.03  | 14.97 | 16.02 | N/A | N/A | N/A | N/A | 3  |
| 109 | 4.33  | 12.47 | 10.27 | 17.58 | N/A | N/A | N/A | N/A | 3  |
| 110 | 18.00 | 35.36 | 16.90 | 20.95 | N/A | N/A | N/A | N/A | 4  |
| 111 | 1.00  | 22.08 | 30.73 | 23.97 | N/A | N/A | N/A | N/A | 5  |
| 112 | 19.00 | 10.39 | 22.90 | 44.15 | N/A | N/A | N/A | N/A | 14 |
| 113 | 9.00  | 12.50 | 44.07 | 36.30 | N/A | N/A | N/A | N/A | 8  |
| 114 | 2.33  | 7.36  | 14.80 | 17.88 | N/A | N/A | N/A | N/A | 4  |
| 115 | 14.33 | 15.67 | 17.03 | 16.67 | N/A | N/A | N/A | N/A | 2  |
| 116 | 16.33 | 19.89 | 51.57 | 51.10 | N/A | N/A | N/A | N/A | 20 |
| 117 | 11.67 | 16.64 | 22.87 | 28.05 | N/A | N/A | N/A | N/A | 3  |
| 118 | 25.33 | 16.12 | 32.53 | 28.23 | N/A | N/A | N/A | N/A | 7  |
| 119 | 13.33 | 26.72 | 13.23 | 10.52 | N/A | N/A | N/A | N/A | 2  |
| 120 | 23.00 | 41.72 | 50.23 | 45.27 | N/A | N/A | N/A | N/A | 17 |
| 121 | 1.33  | 6.17  | 26.60 | 36.07 | N/A | N/A | N/A | N/A | 10 |
| 122 | 5.33  | 2.41  | 12.37 | 11.87 | N/A | N/A | N/A | N/A | 2  |
| 123 | 12.67 | 10.51 | 29.30 | 30.50 | N/A | N/A | N/A | N/A | 7  |
| 124 | 4.00  | 13.70 | 4.93  | 7.39  | N/A | N/A | N/A | N/A | 1  |
| 125 | 21.33 | 9.33  | 22.53 | 22.88 | N/A | N/A | N/A | N/A | 2  |
| 126 | 6.67  | 7.30  | 18.23 | 21.99 | N/A | N/A | N/A | N/A | 4  |
| 127 | 14.00 | 20.46 | 28.13 | 38.97 | N/A | N/A | N/A | N/A | 10 |
| 128 | 23.67 | 39.39 | 41.43 | 37.38 | N/A | N/A | N/A | N/A | 9  |

|     |       |       |       |       |     |     |     |     |    |
|-----|-------|-------|-------|-------|-----|-----|-----|-----|----|
| 129 | 14.33 | 16.81 | 21.27 | 38.24 | N/A | N/A | N/A | N/A | 14 |
| 130 | 10.67 | 6.44  | 6.73  | 14.42 | N/A | N/A | N/A | N/A | 2  |
| 131 | 9.67  | 29.06 | 26.77 | 27.19 | N/A | N/A | N/A | N/A | 7  |
| 132 | 4.33  | 21.53 | 25.87 | 22.75 | N/A | N/A | N/A | N/A | 3  |
| 133 | 29.33 | 21.13 | 52.63 | 48.62 | N/A | N/A | N/A | N/A | 13 |
| 134 | 8.33  | 6.65  | 28.63 | 26.63 | N/A | N/A | N/A | N/A | 6  |
| 135 | 36.33 | 27.50 | 47.27 | 37.50 | N/A | N/A | N/A | N/A | 8  |
| 136 | 17.33 | 16.73 | 45.43 | 30.67 | N/A | N/A | N/A | N/A | 7  |
| 137 | 11.33 | 5.46  | 7.57  | 7.65  | N/A | N/A | N/A | N/A | 1  |
| 138 | 10.00 | 11.50 | 10.83 | 9.16  | N/A | N/A | N/A | N/A | 2  |
| 139 | 1.00  | 9.14  | 39.13 | 30.95 | N/A | N/A | N/A | N/A | 7  |
| 140 | 35.67 | 25.62 | 48.63 | 39.83 | N/A | N/A | N/A | N/A | 11 |
| 141 | 29.67 | 27.89 | 51.83 | 31.54 | N/A | N/A | N/A | N/A | 7  |
| 142 | 18.00 | 10.19 | 34.27 | 27.88 | N/A | N/A | N/A | N/A | 5  |
| 143 | 14.33 | 4.88  | 9.93  | 7.30  | N/A | N/A | N/A | N/A | 1  |
| 144 | 19.00 | 20.00 | 68.27 | 66.00 | N/A | N/A | N/A | N/A | 20 |
| 145 | 12.00 | 14.31 | 50.07 | 31.73 | N/A | N/A | N/A | N/A | 6  |
| 146 | 7.33  | 10.35 | 44.23 | 39.80 | N/A | N/A | N/A | N/A | 10 |
| 147 | 10.33 | 11.00 | 32.97 | 29.00 | N/A | N/A | N/A | N/A | 4  |
| 148 | 13.67 | 15.00 | 51.97 | 42.00 | N/A | N/A | N/A | N/A | 8  |
| 149 | 6.00  | 1.00  | 4.73  | 6.18  | N/A | N/A | N/A | N/A | 1  |
| 150 | 2.33  | 11.00 | 33.10 | 36.00 | N/A | N/A | N/A | N/A | 6  |
| 151 | 7.33  | 2.59  | 7.93  | 7.27  | N/A | N/A | N/A | N/A | 1  |

|     |       |       |       |       |     |     |     |     |    |
|-----|-------|-------|-------|-------|-----|-----|-----|-----|----|
| 152 | 2.67  | 8.00  | 29.47 | 41.00 | N/A | N/A | N/A | N/A | 8  |
| 153 | 17.33 | 13.00 | 28.93 | 36.00 | N/A | N/A | N/A | N/A | 8  |
| 154 | 17.00 | 9.32  | 38.10 | 32.82 | N/A | N/A | N/A | N/A | 6  |
| 155 | 14.33 | 24.00 | 78.20 | 78.00 | N/A | N/A | N/A | N/A | 22 |
| 156 | 19.33 | 11.84 | 31.43 | 40.51 | N/A | N/A | N/A | N/A | 12 |
| 157 | 20.67 | 10.35 | 16.43 | 22.25 | N/A | N/A | N/A | N/A | 4  |
| 158 | 6.67  | 4.10  | 20.80 | 21.49 | N/A | N/A | N/A | N/A | 3  |
| 159 | 18.00 | 15.59 | 28.37 | 35.22 | N/A | N/A | N/A | N/A | 8  |
| 160 | 0.00  | 0.00  | 0.00  | 1.54  | N/A | N/A | N/A | N/A | 0  |
| 161 | 0.00  | 0.00  | 0.00  | 0.00  | N/A | N/A | N/A | N/A | 0  |
| 162 | 0.00  | 0.00  | 0.00  | 1.00  | N/A | N/A | N/A | N/A | 0  |
| 163 | 0.00  | 0.00  | 0.00  | 0.15  | N/A | N/A | N/A | N/A | 0  |
| 164 | 0.00  | 0.00  | 0.00  | 1.00  | N/A | N/A | N/A | N/A | 0  |

**Table S4. Raw data collected from clinical specimens at MGH fertility clinic tested by trained users.** The average processing time excluding the image acquisition time (1s) was 6.63 seconds, and the median time was 4 seconds. The time was calculated by the smartphone application using the cellphone's internal clock.

**CASA repeatability values (sperm concentration)**

|                  |       |                   |        |                   |       |                   |        |
|------------------|-------|-------------------|--------|-------------------|-------|-------------------|--------|
| <i>Sample 53</i> | 93.12 | <i>Sample 83</i>  | 100.00 | <i>Sample 113</i> | 95.99 | <i>Sample 143</i> | 95.29  |
| <i>Sample 54</i> | 97.55 | <i>Sample 84</i>  | 100.00 | <i>Sample 114</i> | 94.67 | <i>Sample 144</i> | 96.02  |
| <i>Sample 55</i> | 93.49 | <i>Sample 85</i>  | 100.00 | <i>Sample 115</i> | 90.36 | <i>Sample 145</i> | 97.70  |
| <i>Sample 56</i> | 98.04 | <i>Sample 86</i>  | 100.00 | <i>Sample 116</i> | 97.96 | <i>Sample 146</i> | 97.32  |
| <i>Sample 57</i> | 94.17 | <i>Sample 87</i>  | 97.89  | <i>Sample 117</i> | 98.42 | <i>Sample 147</i> | 96.53  |
| <i>Sample 58</i> | 96.62 | <i>Sample 88</i>  | 90.86  | <i>Sample 118</i> | 99.63 | <i>Sample 148</i> | 98.32  |
| <i>Sample 59</i> | 98.31 | <i>Sample 89</i>  | 97.87  | <i>Sample 119</i> | 91.86 | <i>Sample 149</i> | 92.65  |
| <i>Sample 60</i> | 98.43 | <i>Sample 90</i>  | 98.67  | <i>Sample 120</i> | 99.71 | <i>Sample 150</i> | 96.29  |
| <i>Sample 61</i> | 96.74 | <i>Sample 91</i>  | 95.14  | <i>Sample 121</i> | 94.92 | <i>Sample 151</i> | 93.46  |
| <i>Sample 62</i> | 95.05 | <i>Sample 92</i>  | 94.79  | <i>Sample 122</i> | 94.67 | <i>Sample 152</i> | 93.50  |
| <i>Sample 63</i> | 97.95 | <i>Sample 93</i>  | 97.45  | <i>Sample 123</i> | 93.09 | <i>Sample 153</i> | 99.01  |
| <i>Sample 64</i> | 98.63 | <i>Sample 94</i>  | 96.61  | <i>Sample 124</i> | 96.05 | <i>Sample 154</i> | 98.49  |
| <i>Sample 65</i> | 99.00 | <i>Sample 95</i>  | 96.70  | <i>Sample 125</i> | 93.09 | <i>Sample 155</i> | 98.04  |
| <i>Sample 66</i> | 97.91 | <i>Sample 96</i>  | 93.93  | <i>Sample 126</i> | 97.24 | <i>Sample 156</i> | 96.53  |
| <i>Sample 67</i> | 97.55 | <i>Sample 97</i>  | 95.00  | <i>Sample 127</i> | 95.02 | <i>Sample 157</i> | 93.31  |
| <i>Sample 68</i> | 96.51 | <i>Sample 98</i>  | 97.95  | <i>Sample 128</i> | 99.10 | <i>Sample 158</i> | 100.00 |
| <i>Sample 69</i> | 95.46 | <i>Sample 99</i>  | 95.62  | <i>Sample 129</i> | 98.13 | <i>Sample 159</i> | 96.27  |
| <i>Sample 70</i> | 97.79 | <i>Sample 100</i> | 95.72  | <i>Sample 130</i> | 93.95 | <i>Sample 160</i> | 100.00 |
| <i>Sample 71</i> | 98.15 | <i>Sample 101</i> | 95.21  | <i>Sample 131</i> | 97.18 | <i>Sample 161</i> | 100.00 |
| <i>Sample 72</i> | 97.57 | <i>Sample 102</i> | 98.28  | <i>Sample 132</i> | 98.09 | <i>Sample 162</i> | 100.00 |
| <i>Sample 73</i> | 96.19 | <i>Sample 103</i> | 98.33  | <i>Sample 133</i> | 97.62 | <i>Sample 163</i> | 100.00 |
| <i>Sample 74</i> | 97.57 | <i>Sample 104</i> | 95.79  | <i>Sample 134</i> | 98.17 | <i>Sample 164</i> | 100.00 |
| <i>Sample 75</i> | 98.83 | <i>Sample 105</i> | 96.77  | <i>Sample 135</i> | 98.76 |                   |        |
| <i>Sample 76</i> | 99.44 | <i>Sample 106</i> | 98.71  | <i>Sample 136</i> | 96.18 |                   |        |
| <i>Sample 77</i> | 95.99 | <i>Sample 107</i> | 93.58  | <i>Sample 137</i> | 93.99 |                   |        |
| <i>Sample 78</i> | 98.78 | <i>Sample 108</i> | 95.11  | <i>Sample 138</i> | 96.12 |                   |        |

|                  |       |                   |       |                   |       |  |  |
|------------------|-------|-------------------|-------|-------------------|-------|--|--|
| <i>Sample 79</i> | 98.05 | <i>Sample 109</i> | 92.20 | <i>Sample 139</i> | 92.99 |  |  |
| <i>Sample 80</i> | 95.86 | <i>Sample 110</i> | 92.64 | <i>Sample 140</i> | 97.70 |  |  |
| <i>Sample 81</i> | 94.88 | <i>Sample 111</i> | 92.88 | <i>Sample 141</i> | 99.39 |  |  |
| <i>Sample 82</i> | 65.11 | <i>Sample 112</i> | 97.40 | <i>Sample 142</i> | 99.05 |  |  |

**Table S5. Repeatability measures for the concentration parameter.** The average repeatability was 96.40%.



**CASA repeatability values (sperm motility)**

|                  |        |                   |        |                   |        |                   |        |
|------------------|--------|-------------------|--------|-------------------|--------|-------------------|--------|
| <i>Sample 53</i> | 50.00  | <i>Sample 83</i>  | 100.00 | <i>Sample 113</i> | 90.00  | <i>Sample 143</i> | 86.00  |
| <i>Sample 54</i> | 100.00 | <i>Sample 84</i>  | 100.00 | <i>Sample 114</i> | 77.78  | <i>Sample 144</i> | 66.57  |
| <i>Sample 55</i> | 50.00  | <i>Sample 85</i>  | 100.00 | <i>Sample 115</i> | 97.73  | <i>Sample 145</i> | 92.31  |
| <i>Sample 56</i> | 100.00 | <i>Sample 86</i>  | 100.00 | <i>Sample 116</i> | 96.08  | <i>Sample 146</i> | 84.62  |
| <i>Sample 57</i> | 50.00  | <i>Sample 87</i>  | 99.08  | <i>Sample 117</i> | 94.59  | <i>Sample 147</i> | 88.57  |
| <i>Sample 58</i> | 100.00 | <i>Sample 88</i>  | 97.16  | <i>Sample 118</i> | 94.58  | <i>Sample 148</i> | 95.35  |
| <i>Sample 59</i> | 75.29  | <i>Sample 89</i>  | 81.94  | <i>Sample 119</i> | 91.73  | <i>Sample 149</i> | 85.71  |
| <i>Sample 60</i> | 94.51  | <i>Sample 90</i>  | 92.31  | <i>Sample 120</i> | 95.83  | <i>Sample 150</i> | 87.50  |
| <i>Sample 61</i> | 95.30  | <i>Sample 91</i>  | 91.76  | <i>Sample 121</i> | 66.67  | <i>Sample 151</i> | 91.67  |
| <i>Sample 62</i> | 94.10  | <i>Sample 92</i>  | 86.84  | <i>Sample 122</i> | 81.61  | <i>Sample 152</i> | 88.89  |
| <i>Sample 63</i> | 93.84  | <i>Sample 93</i>  | 93.73  | <i>Sample 123</i> | 91.33  | <i>Sample 153</i> | 92.27  |
| <i>Sample 64</i> | 97.04  | <i>Sample 94</i>  | 92.86  | <i>Sample 124</i> | 87.39  | <i>Sample 154</i> | 94.44  |
| <i>Sample 65</i> | 92.66  | <i>Sample 95</i>  | 98.00  | <i>Sample 125</i> | 98.46  | <i>Sample 155</i> | 94.20  |
| <i>Sample 66</i> | 83.02  | <i>Sample 96</i>  | 95.41  | <i>Sample 126</i> | 95.24  | <i>Sample 156</i> | 94.15  |
| <i>Sample 67</i> | 96.85  | <i>Sample 97</i>  | 79.71  | <i>Sample 127</i> | 96.04  | <i>Sample 157</i> | 93.43  |
| <i>Sample 68</i> | 96.64  | <i>Sample 98</i>  | 93.33  | <i>Sample 128</i> | 97.26  | <i>Sample 158</i> | 88.32  |
| <i>Sample 69</i> | 90.63  | <i>Sample 99</i>  | 93.33  | <i>Sample 129</i> | 94.20  | <i>Sample 159</i> | 96.89  |
| <i>Sample 70</i> | 98.41  | <i>Sample 100</i> | 97.73  | <i>Sample 130</i> | 84.03  | <i>Sample 160</i> | 100.00 |
| <i>Sample 71</i> | 94.95  | <i>Sample 101</i> | 88.94  | <i>Sample 131</i> | 88.94  | <i>Sample 161</i> | 100.00 |
| <i>Sample 72</i> | 96.87  | <i>Sample 102</i> | 93.12  | <i>Sample 132</i> | 78.29  | <i>Sample 162</i> | 100.00 |
| <i>Sample 73</i> | 92.13  | <i>Sample 103</i> | 89.87  | <i>Sample 133</i> | 90.83  | <i>Sample 163</i> | 100.00 |
| <i>Sample 74</i> | 97.44  | <i>Sample 104</i> | 89.11  | <i>Sample 134</i> | 90.43  | <i>Sample 164</i> | 100.00 |
| <i>Sample 75</i> | 98.61  | <i>Sample 105</i> | 94.54  | <i>Sample 135</i> | 94.33  |                   |        |
| <i>Sample 76</i> | 93.67  | <i>Sample 106</i> | 100.00 | <i>Sample 136</i> | 95.16  |                   |        |
| <i>Sample 77</i> | 90.48  | <i>Sample 107</i> | 91.67  | <i>Sample 137</i> | 97.14  |                   |        |
| <i>Sample 78</i> | 93.33  | <i>Sample 108</i> | 94.56  | <i>Sample 138</i> | 94.54  |                   |        |
| <i>Sample 79</i> | 92.86  | <i>Sample 109</i> | 86.67  | <i>Sample 139</i> | 100.00 |                   |        |

|                  |       |                   |       |                   |       |  |  |
|------------------|-------|-------------------|-------|-------------------|-------|--|--|
| <i>Sample 80</i> | 93.33 | <i>Sample 110</i> | 92.18 | <i>Sample 140</i> | 97.59 |  |  |
| <i>Sample 81</i> | 94.20 | <i>Sample 111</i> | 63.40 | <i>Sample 141</i> | 98.89 |  |  |
| <i>Sample 82</i> | 50.00 | <i>Sample 112</i> | 95.00 | <i>Sample 142</i> | 96.89 |  |  |

**Table S6. Repeatability measures for the motility parameter.** The average repeatability was 91.00%.

|      |          | Smartphone |          |                     |
|------|----------|------------|----------|---------------------|
|      |          | Negative   | Positive |                     |
| CASA | Negative | 17         | 2        | Specificity: 89.47% |
|      | Positive | 1          | 144      | Sensitivity: 99.31% |
|      |          |            |          | Accuracy: 98.17%    |

**Table S7. Diagnostic results for samples tested by trained users.** Contingency table for diagnosis based on both sperm concentration and motility parameters using patients' semen samples (n=164). Negative indicates semen samples with sperm concentration and motility above the WHO threshold (sperm concentration > 15 million sperm/mL and sperm motility > 40%). Positive indicates semen samples with sperm concentration or motility below the WHO threshold (sperm concentration < 15 million sperm/mL or sperm motility < 40%).

|                  | MOTO X                                           |                          |             | MOTO G4                                          |                          |             | LG G4                                            |                          |             |
|------------------|--------------------------------------------------|--------------------------|-------------|--------------------------------------------------|--------------------------|-------------|--------------------------------------------------|--------------------------|-------------|
|                  | Concentration<br>(x 10 <sup>6</sup><br>sperm/mL) | Total<br>Motility<br>(%) | Time<br>(s) | Concentration<br>(x 10 <sup>6</sup><br>sperm/mL) | Total<br>Motility<br>(%) | Time<br>(s) | Concentration<br>(x 10 <sup>6</sup><br>sperm/mL) | Total<br>Motility<br>(%) | Time<br>(s) |
| <i>Sample 1</i>  | 11                                               | 9                        | 1           | 8                                                | 10                       | 7           | 9                                                | 13                       | 2           |
| <i>Sample 2</i>  | 24                                               | 13                       | 1           | 17                                               | 9                        | 6           | 19                                               | 19                       | 3           |
| <i>Sample 3</i>  | 16                                               | 16                       | 1           | 16                                               | 12                       | 6           | 19                                               | 10                       | 3           |
| <i>Sample 4</i>  | 20                                               | 16                       | 1           | 23                                               | 12                       | 6           | 28                                               | 18                       | 2           |
| <i>Sample 5</i>  | 24                                               | 10                       | 1           | 21                                               | 16                       | 5           | 17                                               | 19                       | 4           |
| <i>Sample 6</i>  | 45                                               | 46                       | 3           | 47                                               | 45                       | 11          | 30                                               | 42                       | 5           |
| <i>Sample 7</i>  | 47                                               | 48                       | 6           | 50                                               | 51                       | 8           | 37                                               | 50                       | 30          |
| <i>Sample 8</i>  | 49                                               | 51                       | 4           | 51                                               | 52                       | 10          | 37                                               | 48                       | 6           |
| <i>Sample 9</i>  | 4                                                | 0                        | 1           | 2                                                | 0                        | 3           | 2                                                | 0                        | 2           |
| <i>Sample 10</i> | 5                                                | 0                        | 1           | 2                                                | 0                        | 4           | 5                                                | 3                        | 2           |
| <i>Sample 11</i> | 6                                                | 4                        | 1           | 4                                                | 3                        | 4           | 5                                                | 0                        | 2           |
| <i>Sample 12</i> | 5                                                | 0                        | 1           | 2                                                | 0                        | 4           | 4                                                | 0                        | 2           |
| <i>Sample 13</i> | 39                                               | 38                       | 2           | 42                                               | 38                       | 11          | 25                                               | 19                       | 6           |

**Table S8. Comparison of the performance of three different phones with the smartphone-based semen analyzer.** Green and blue colors represent values greater and smaller than the WHO thresholds for the corresponding semen parameter (sperm concentration of 15 million sperm/mL; sperm motility of 40%), respectively. The average times for analyzing the 13 semen samples using Moto X, Moto G4, and LG G4 were 1.85 s, 6.54 s, and 5.31 s, respectively. The median times for semen analysis were 1 s, 6 s, and 3 s for the three phones.

*Raw patient data (untrained users)*

| <i>Sample #</i> | Total motility (%) |            | Concentration (x10 <sup>6</sup> sperm/mL) |            | Time (s) |
|-----------------|--------------------|------------|-------------------------------------------|------------|----------|
|                 | CASA               | Smartphone | CASA                                      | Smartphone |          |
| 1               | 27                 | 10         | 50.8                                      | 28.21      | 1        |
| 2               | 0                  | 4.054      | 34                                        | 17.536     | 1        |
| 3               | 27                 | 23.21      | 23.9                                      | 22.3       | 1        |
| 4               | 18                 | 8.09       | 52.1                                      | 39.02      | 2        |
| 5               | 37                 | 43.33      | 36.8                                      | 38.522     | 2        |
| 6               | 32                 | 37.731     | 84.7                                      | 75.103     | 4        |
| 7               | 28                 | 33.66      | 119.8                                     | 92.079     | 1        |
| 8               | 26                 | 33.18      | 53.9                                      | 50.94      | 1        |
| 9               | 2                  | 1          | 38.5                                      | 19.34      | 1        |
| 10              | 20                 | 12.79      | 79.8                                      | 61.72      | 3        |
| 11              | 22                 | 35.29      | 49.4                                      | 31.74      | 4        |
| 12              | 18                 | 12.72      | 57.2                                      | 72.54      | 4        |
| 13              | 13                 | 10.87      | 105.1                                     | 45.45      | 4        |
| 14              | 17                 | 11.95      | 60.9                                      | 52.31      | 3        |
| 15              | 20                 | 5.7        | 76.6                                      | 36.6       | 3        |
| 16              | 11                 | 10         | 46.5                                      | 45.75      | 3        |
| 17              | 19                 | 17.47      | 52.8                                      | 40.32      | 3        |
| 18              | 26                 | 37.26      | 49                                        | 40.94      | 2        |
| 19              | 25                 | 37.92      | 10.9                                      | 5.59       | 2        |
| 20              | 49                 | 66.66      | 50.2                                      | 90.28      | 2        |

|    |    |         |       |         |   |
|----|----|---------|-------|---------|---|
| 21 | 6  | 3.84    | 24.1  | 40.8    | 3 |
| 22 | 1  | 8.2     | 48.1  | 34.31   | 3 |
| 23 | 89 | 64.01   | 86.4  | 81.67   | 3 |
| 24 | 7  | 7.4     | 55.6  | 34.51   | 4 |
| 25 | 67 | 66.3    | 84.4  | 85.44   | 2 |
| 26 | 13 | 11.63   | 66.3  | 68.57   | 2 |
| 27 | 94 | 80.1724 | 111.7 | 99.64   | 1 |
| 28 | 14 | 24.29   | 56    | 38.48   | 6 |
| 29 | 21 | 26.8    | 70    | 59.13   | 1 |
| 30 | 29 | 34.37   | 116.2 | 44.65   | 5 |
| 31 | 25 | 20.26   | 39    | 39.3643 | 1 |
| 32 | 7  | 7.88    | 48.1  | 50.38   | 1 |
| 33 | 17 | 9.13    | 47.9  | 48.65   | 1 |
| 34 | 33 | 35.29   | 20.2  | 81.74   | 1 |
| 35 | 33 | 23.8    | 113.9 | 80.95   | 3 |
| 36 | 8  | 12.9    | 56.4  | 49.119  | 4 |
| 37 | 6  | 5.16    | 33.4  | 41.87   | 3 |
| 38 | 4  | 7.4     | 15.3  | 13.74   | 4 |
| 39 | 92 | 72.41   | 9.6   | 6.7     | 2 |
| 40 | 3  | 5.7     | 40.3  | 25.18   | 2 |
| 41 | 24 | 31      | 59.9  | 48.6    | 2 |
| 42 | 21 | 15.51   | 59.7  | 64.65   | 3 |
| 43 | 4  | 10.29   | 60.8  | 50.57   | 2 |

|    |    |        |      |         |   |
|----|----|--------|------|---------|---|
| 44 | 1  | 6.2    | 48.6 | 33.34   | 1 |
| 45 | 67 | 67     | 54.5 | 82.5    | 3 |
| 46 | 84 | 74     | 46.9 | 32      | 2 |
| 47 | 19 | 19.17  | 58.9 | 47.4    | 2 |
| 48 | 13 | 5.8    | 63.4 | 42.69   | 1 |
| 49 | 1  | 1.17   | 22   | 19.339  | 2 |
| 50 | 12 | 7.77   | 53.8 | 41.6    | 1 |
| 51 | 28 | 19.4   | 69.5 | 68.8    | 3 |
| 52 | 69 | 66.66  | 90.9 | 90.47   | 3 |
| 53 | 17 | 21.02  | 38.2 | 36.78   | 8 |
| 54 | 26 | 30.65  | 53.9 | 43.6    | 3 |
| 55 | 11 | 4.7    | 47.6 | 55.07   | 3 |
| 56 | 88 | 71.551 | 76.2 | 55.17   | 3 |
| 57 | 28 | 22.522 | 12.8 | 27.2105 | 4 |
| 58 | 73 | 58.477 | 99   | 55.6889 | 3 |
| 59 | 0  | 3.9    | 34   | 28.34   | 1 |
| 60 | 11 | 3.8    | 46.8 | 21.01   | 2 |
| 61 | 0  | 7.38   | 47.9 | 35.06   | 2 |
| 62 | 0  | 6      | 40.2 | 50.55   | 2 |
| 63 | 28 | 33.928 | 61.5 | 51.37   | 4 |
| 64 | 47 | 70.81  | 52.6 | 80.51   | 6 |
| 65 | 28 | 20     | 53.2 | 51.89   | 2 |
| 66 | 47 | 43.54  | 56.2 | 53.7    | 4 |

|    |    |        |      |         |   |
|----|----|--------|------|---------|---|
| 67 | 35 | 30.67  | 74.4 | 64.25   | 2 |
| 68 | 21 | 33.81  | 63.3 | 46.65   | 6 |
| 69 | 3  | 6.18   | 40.3 | 17.511  | 4 |
| 70 | 15 | 17.3   | 54.8 | 53.07   | 3 |
| 71 | 11 | 9.31   | 42.7 | 44.16   | 1 |
| 72 | 10 | 5.6    | 47.1 | 45.71   | 3 |
| 73 | 6  | 0      | 68.1 | 41.86   | 3 |
| 74 | 2  | 5.6    | 77.1 | 58.93   | 2 |
| 75 | 7  | 11.7   | 74.2 | 42.33   | 1 |
| 76 | 10 | 4.4    | 44.6 | 29.93   | 2 |
| 77 | 0  | 7.76   | 41.7 | 25.01   | 3 |
| 78 | 1  | 7.66   | 24.6 | 23.8815 | 6 |
| 79 | 28 | 37.962 | 60   | 51.4514 | 3 |
| 80 | 18 | 23.9   | 54.3 | 73.63   | 3 |
| 81 | 79 | 64.28  | 10.3 | 6.2     | 3 |
| 82 | 84 | 56.75  | 10.8 | 8.82    | 3 |
| 83 | 20 | 17.45  | 51.2 | 47.78   | 3 |
| 84 | 19 | 11.71  | 57.5 | 27.8    | 2 |
| 85 | 7  | 4.8    | 69.7 | 34.41   | 2 |
| 86 | 0  | 0      | 51   | 23      | 3 |
| 87 | 40 | 35.2   | 20   | 61.6    | 3 |
| 88 | 29 | 19.58  | 60.3 | 28.17   | 2 |
| 89 | 26 | 21.02  | 43.2 | 47.15   | 3 |

|     |    |         |       |         |   |
|-----|----|---------|-------|---------|---|
| 90  | 19 | 29      | 54    | 50.51   | 3 |
| 91  | 10 | 8.38    | 46.7  | 33.42   | 2 |
| 92  | 22 | 22.96   | 7.8   | 3.02    | 3 |
| 93  | 24 | 23.76   | 59.9  | 47.42   | 5 |
| 94  | 17 | 7.79    | 70.7  | 44.13   | 3 |
| 95  | 0  | 6.89    | 28.7  | 15.5764 | 4 |
| 96  | 55 | 66      | 80.1  | 99      | 3 |
| 97  | 96 | 68.58   | 108.5 | 62.07   | 2 |
| 98  | 19 | 10.74   | 41.5  | 41.5    | 3 |
| 99  | 28 | 42.43   | 69.5  | 62.43   | 2 |
| 100 | 2  | 6.194   | 46.9  | 26.26   | 2 |
| 101 | 33 | 15.38   | 8.1   | 7.59    | 2 |
| 102 | 43 | 34.92   | 112.2 | 71.66   | 4 |
| 103 | 19 | 6.2     | 50.2  | 42.3403 | 5 |
| 104 | 15 | 16.12   | 46.7  | 50.62   | 3 |
| 105 | 1  | 7.246   | 23.7  | 17.8144 | 3 |
| 106 | 13 | 7.4     | 48    | 41.15   | 4 |
| 107 | 21 | 9.9     | 46.7  | 47.6    | 3 |
| 108 | 19 | 8       | 61.5  | 32.1    | 2 |
| 109 | 19 | 17.2    | 79.3  | 51.45   | 3 |
| 110 | 60 | 64.74   | 84    | 100     | 3 |
| 111 | 24 | 31.1627 | 52.6  | 50.73   | 2 |
| 112 | 60 | 72.566  | 58.5  | 79.64   | 2 |



|     |    |       |      |         |   |
|-----|----|-------|------|---------|---|
| 113 | 1  | 4.7   | 74.5 | 39.32   | 3 |
| 114 | 59 | 44.23 | 73.8 | 50.15   | 2 |
| 115 | 15 | 22.42 | 46.7 | 23.41   | 4 |
| 116 | 6  | 10.44 | 60.5 | 42.92   | 5 |
| 117 | 26 | 20.89 | 43.2 | 10.3679 | 3 |
| 118 | 4  | 11.28 | 71.7 | 40.23   | 3 |
| 119 | 26 | 24.43 | 49   | 76.97   | 2 |
| 120 | 1  | 5.3   | 14.1 | 23.61   | 4 |
| 121 | 15 | 8.48  | 44.2 | 58.01   | 2 |
| 122 | 21 | 22.93 | 50.7 | 56.43   | 3 |
| 123 | 16 | 13.86 | 48.1 | 57.25   | 5 |
| 124 | 0  | 0.42  | 58.3 | 16.145  | 3 |
| 125 | 0  | 0     | 18.7 | 22.39   | 3 |
| 126 | 1  | 3.62  | 39.7 | 30.9    | 2 |
| 127 | 28 | 19.56 | 68.2 | 57.75   | 2 |
| 128 | 9  | 8.6   | 52.1 | 44.79   | 2 |
| 129 | 0  | 0     | 22.1 | 16.48   | 2 |
| 130 | 35 | 21.91 | 55.7 | 21.04   | 1 |
| 131 | 2  | 5.9   | 46.9 | 33.21   | 4 |
| 132 | 1  | 19    | 16.9 | 19      | 4 |
| 133 | 15 | 43    | 47.1 | 56      | 7 |
| 134 | 72 | 63    | 25.8 | 23      | 3 |
| 135 | 71 | 64    | 36.8 | 20      | 3 |

|     |    |    |      |    |    |
|-----|----|----|------|----|----|
| 136 | 19 | 18 | 13.9 | 14 | 3  |
| 137 | 18 | 31 | 18   | 25 | 2  |
| 138 | 28 | 9  | 9.6  | 13 | 2  |
| 139 | 13 | 19 | 10.3 | 15 | 2  |
| 140 | 11 | 21 | 5.4  | 7  | 4  |
| 141 | 16 | 25 | 5.7  | 6  | 2  |
| 142 | 0  | 0  | 0    | 0  | 2  |
| 143 | 0  | 0  | 0    | 0  | 1  |
| 144 | 3  | 16 | 18.4 | 15 | 1  |
| 145 | 80 | 65 | 43.2 | 32 | 1  |
| 146 | 22 | 36 | 44.3 | 46 | 1  |
| 147 | 71 | 78 | 25.9 | 19 | 1  |
| 148 | 68 | 61 | 34.1 | 25 | 2  |
| 149 | 18 | 27 | 11.5 | 13 | 1  |
| 150 | 18 | 23 | 19.4 | 17 | 5  |
| 151 | 19 | 0  | 10.4 | 3  | 10 |
| 152 | 14 | 21 | 9.8  | 12 | 2  |
| 153 | 5  | 9  | 6.5  | 10 | 4  |
| 154 | 26 | 15 | 5.8  | 5  | 2  |
| 155 | 23 | 14 | 4.3  | 4  | 3  |
| 156 | 25 | 21 | 5.3  | 2  | 1  |
| 157 | 24 | 22 | 7.6  | 14 | 2  |
| 158 | 65 | 51 | 10.1 | 7  | 2  |

|     |    |    |      |    |   |
|-----|----|----|------|----|---|
| 159 | 34 | 26 | 6.9  | 6  | 1 |
| 160 | 46 | 40 | 7.8  | 7  | 2 |
| 161 | 20 | 13 | 6.8  | 3  | 1 |
| 162 | 32 | 20 | 2.8  | 5  | 2 |
| 163 | 0  | 0  | 0.4  | 5  | 2 |
| 164 | 34 | 29 | 7.4  | 6  | 1 |
| 165 | 0  | 0  | 0.2  | 6  | 2 |
| 166 | 58 | 50 | 4.4  | 3  | 1 |
| 167 | 70 | 42 | 5    | 3  | 2 |
| 168 | 89 | 60 | 16   | 12 | 1 |
| 169 | 22 | 28 | 81.2 | 34 | 2 |
| 170 | 0  | 0  | 0    | 0  | 1 |
| 171 | 0  | 0  | 0    | 2  | 1 |
| 172 | 21 | 11 | 6.9  | 6  | 1 |
| 173 | 19 | 11 | 5.7  | 3  | 9 |
| 174 | 19 | 20 | 9.3  | 3  | 1 |
| 175 | 67 | 70 | 9    | 5  | 1 |
| 176 | 27 | 26 | 8.8  | 5  | 2 |
| 177 | 18 | 15 | 6.9  | 4  | 1 |
| 178 | 29 | 19 | 3.1  | 4  | 1 |
| 179 | 0  | 0  | 1    | 4  | 2 |
| 180 | 33 | 30 | 6    | 9  | 1 |
| 181 | 0  | 0  | 0    | 0  | 1 |

|     |    |    |      |    |   |
|-----|----|----|------|----|---|
| 182 | 67 | 48 | 6.8  | 8  | 1 |
| 183 | 89 | 93 | 16   | 17 | 3 |
| 184 | 0  | 29 | 41.5 | 32 | 1 |
| 185 | 0  | 0  | 0    | 2  | 1 |
| 186 | 0  | 0  | 0    | 0  | 1 |

**Table S9. Raw data collected from clinical specimens at MGH fertility clinic tested by untrained users.** The average processing time excluding the image acquisition time (1s) was 2.56 seconds, and the median time was 2 seconds. The time was calculated by the smartphone application using the cellphone’s internal clock.

|      |          | Smartphone |          |                     |
|------|----------|------------|----------|---------------------|
|      |          | Negative   | Positive |                     |
| CASA | Negative | 22         | 2        | Specificity: 91.67% |
|      | Positive | 3          | 159      | Sensitivity: 98.15% |
|      |          |            |          | Accuracy: 97.31%    |

**Table S10. Diagnostic results for samples tested by untrained users.** Contingency table for results based on both sperm concentration and motility parameters for patient semen samples (n=186). Negative indicates semen samples with sperm concentration and motility above the WHO threshold (sperm concentration > 15 million sperm/mL and sperm motility > 40%). Positive indicates semen samples with sperm concentration or motility below the WHO threshold (sperm concentration < 15 million sperm/mL or sperm motility < 40%).

*CASA replicates*

| <i>Sample #</i>  | <b>Total motility (%)</b> |             |             | <b>Concentration (x10<sup>6</sup> sperm/mL)</b> |             |             |
|------------------|---------------------------|-------------|-------------|-------------------------------------------------|-------------|-------------|
|                  | Replicate 1               | Replicate 2 | Replicate 3 | Replicate 1                                     | Replicate 2 | Replicate 3 |
| <i>Sample 53</i> | 1                         | 0           | 0           | 62.4                                            | 78          | 79.2        |
| <i>Sample 54</i> | 0                         | 0           | 0           | 21                                              | 21.4        | 22.8        |
| <i>Sample 55</i> | 0                         | 2           | 0           | 23.2                                            | 18.8        | 19.1        |
| <i>Sample 56</i> | 0                         | 0           | 0           | 27.2                                            | 27.4        | 25.7        |
| <i>Sample 57</i> | 0                         | 1           | 0           | 51.6                                            | 42.2        | 44.3        |
| <i>Sample 58</i> | 0                         | 0           | 0           | 46                                              | 46.8        | 51.4        |
| <i>Sample 59</i> | 5                         | 20          | 16          | 5.1                                             | 5.3         | 5           |
| <i>Sample 60</i> | 27                        | 32          | 27          | 19.4                                            | 20          | 20.5        |
| <i>Sample 61</i> | 51                        | 48          | 43          | 53.9                                            | 49.5        | 48.3        |
| <i>Sample 62</i> | 41                        | 47          | 51          | 53.7                                            | 49.9        | 44.8        |
| <i>Sample 63</i> | 49                        | 39          | 44          | 41.5                                            | 39          | 39          |
| <i>Sample 64</i> | 45                        | 41          | 45          | 43.8                                            | 43          | 45.1        |
| <i>Sample 65</i> | 42                        | 36          | 32          | 37.5                                            | 36.5        | 36.3        |
| <i>Sample 66</i> | 39                        | 42          | 20          | 43.8                                            | 44.6        | 47          |
| <i>Sample 67</i> | 47                        | 45          | 42          | 46.7                                            | 43.3        | 43.4        |
| <i>Sample 68</i> | 43                        | 47          | 42          | 77.2                                            | 68.2        | 71.8        |
| <i>Sample 69</i> | 26                        | 35          | 26          | 39.8                                            | 45.7        | 46.4        |
| <i>Sample 70</i> | 53                        | 55          | 56          | 93.2                                            | 99          | 92.1        |
| <i>Sample 71</i> | 25                        | 30          | 27          | 44.7                                            | 47.1        | 44.4        |
| <i>Sample 72</i> | 27                        | 26          | 29          | 45.7                                            | 48.7        | 44.9        |
| <i>Sample 73</i> | 29                        | 39          | 36          | 70.6                                            | 79.5        | 79.9        |
| <i>Sample 74</i> | 21                        | 23          | 22          | 45.2                                            | 43.2        | 47.1        |
| <i>Sample 75</i> | 23                        | 24          | 24          | 62                                              | 60.4        | 62.9        |
| <i>Sample 76</i> | 28                        | 23          | 23          | 48.3                                            | 49.2        | 49          |

|                   |    |    |    |      |      |      |
|-------------------|----|----|----|------|------|------|
| <i>Sample 77</i>  | 14 | 10 | 14 | 25.9 | 25.7 | 22.7 |
| <i>Sample 78</i>  | 11 | 14 | 12 | 20.9 | 21.8 | 21.5 |
| <i>Sample 79</i>  | 20 | 16 | 16 | 20.5 | 20.5 | 19.3 |
| <i>Sample 80</i>  | 13 | 16 | 13 | 24.3 | 24.1 | 21.2 |
| <i>Sample 81</i>  | 16 | 13 | 14 | 29.5 | 35.4 | 31.5 |
| <i>Sample 82</i>  | 0  | 21 | 0  | 0.7  | 1.1  | 0    |
| <i>Sample 83</i>  | 0  | 0  | 0  | 0    | 0    | 0    |
| <i>Sample 84</i>  | 0  | 0  | 0  | 0    | 0    | 0    |
| <i>Sample 85</i>  | 0  | 0  | 0  | 0    | 0    | 0    |
| <i>Sample 86</i>  | 0  | 0  | 0  | 0    | 0    | 0    |
| <i>Sample 87</i>  | 62 | 63 | 61 | 22   | 22.8 | 23.7 |
| <i>Sample 88</i>  | 50 | 52 | 47 | 7.2  | 7.5  | 9.8  |
| <i>Sample 89</i>  | 17 | 11 | 8  | 1.5  | 1.5  | 1.6  |
| <i>Sample 90</i>  | 29 | 24 | 22 | 19.8 | 19.4 | 18.9 |
| <i>Sample 91</i>  | 14 | 19 | 18 | 10.6 | 8.9  | 10.1 |
| <i>Sample 92</i>  | 20 | 28 | 17 | 18.4 | 19.2 | 22   |
| <i>Sample 93</i>  | 27 | 34 | 30 | 35.7 | 32.9 | 33.2 |
| <i>Sample 94</i>  | 4  | 5  | 4  | 27.9 | 29.9 | 26.5 |
| <i>Sample 95</i>  | 16 | 16 | 17 | 53.9 | 51.4 | 47.9 |
| <i>Sample 96</i>  | 18 | 20 | 17 | 61.6 | 72.1 | 77   |
| <i>Sample 97</i>  | 16 | 6  | 14 | 7.5  | 9    | 8.2  |
| <i>Sample 98</i>  | 16 | 20 | 20 | 13.8 | 13.4 | 14.4 |
| <i>Sample 99</i>  | 14 | 12 | 11 | 21.5 | 19.5 | 18.4 |
| <i>Sample 100</i> | 14 | 14 | 15 | 61.3 | 71.4 | 65   |
| <i>Sample 101</i> | 8  | 9  | 12 | 21.2 | 18.7 | 18   |
| <i>Sample 102</i> | 22 | 20 | 17 | 48.6 | 51.3 | 51.2 |
| <i>Sample 103</i> | 13 | 10 | 9  | 17.6 | 16.9 | 17.9 |

|                   |    |    |    |      |      |      |
|-------------------|----|----|----|------|------|------|
| <i>Sample 104</i> | 26 | 24 | 17 | 6.6  | 7.6  | 7.5  |
| <i>Sample 105</i> | 9  | 10 | 11 | 19   | 17.9 | 20.1 |
| <i>Sample 106</i> | 1  | 1  | 1  | 33.6 | 33.6 | 32.3 |
| <i>Sample 107</i> | 10 | 10 | 13 | 29.7 | 26.4 | 23.4 |
| <i>Sample 108</i> | 15 | 14 | 17 | 13.5 | 16.1 | 15.3 |
| <i>Sample 109</i> | 3  | 5  | 5  | 12   | 9.5  | 9.3  |
| <i>Sample 110</i> | 20 | 19 | 15 | 17.3 | 14.4 | 19   |
| <i>Sample 111</i> | 0  | 2  | 1  | 35.2 | 27.2 | 29.8 |
| <i>Sample 112</i> | 20 | 17 | 20 | 24.1 | 22.1 | 22.5 |
| <i>Sample 113</i> | 8  | 11 | 8  | 45.6 | 40.4 | 46.2 |
| <i>Sample 114</i> | 3  | 1  | 3  | 14.4 | 16.4 | 13.6 |
| <i>Sample 115</i> | 14 | 14 | 15 | 13.4 | 18.8 | 18.9 |
| <i>Sample 116</i> | 17 | 17 | 15 | 53.7 | 50.3 | 50.7 |
| <i>Sample 117</i> | 13 | 11 | 11 | 22.5 | 23.6 | 22.5 |
| <i>Sample 118</i> | 23 | 28 | 25 | 32.3 | 32.7 | 32.6 |
| <i>Sample 119</i> | 14 | 11 | 15 | 14.2 | 14.6 | 10.9 |
| <i>Sample 120</i> | 24 | 24 | 21 | 50.2 | 50   | 50.5 |
| <i>Sample 121</i> | 2  | 0  | 2  | 24.3 | 29.2 | 26.3 |
| <i>Sample 122</i> | 7  | 3  | 6  | 11.1 | 13.5 | 12.5 |
| <i>Sample 123</i> | 12 | 11 | 15 | 25.2 | 32.6 | 30.1 |
| <i>Sample 124</i> | 4  | 3  | 5  | 4.6  | 4.9  | 5.3  |
| <i>Sample 125</i> | 21 | 21 | 22 | 24.9 | 23.4 | 19.3 |
| <i>Sample 126</i> | 6  | 7  | 7  | 18.8 | 17.2 | 18.7 |
| <i>Sample 127</i> | 15 | 14 | 13 | 31   | 27.3 | 26.1 |
| <i>Sample 128</i> | 23 | 25 | 23 | 41.4 | 40.8 | 42.1 |
| <i>Sample 129</i> | 16 | 14 | 13 | 22   | 21.2 | 20.6 |
| <i>Sample 130</i> | 14 | 7  | 11 | 7.6  | 6.3  | 6.3  |

|                   |    |    |    |      |      |      |
|-------------------|----|----|----|------|------|------|
| <i>Sample 131</i> | 12 | 8  | 9  | 26.2 | 28.3 | 25.8 |
| <i>Sample 132</i> | 6  | 5  | 2  | 24.9 | 26.1 | 26.6 |
| <i>Sample 133</i> | 35 | 28 | 25 | 50.8 | 52   | 55.1 |
| <i>Sample 134</i> | 10 | 8  | 7  | 29.7 | 28.1 | 28.1 |
| <i>Sample 135</i> | 39 | 38 | 32 | 48.4 | 47   | 46.4 |
| <i>Sample 136</i> | 19 | 17 | 16 | 45.9 | 48.3 | 42.1 |
| <i>Sample 137</i> | 11 | 11 | 12 | 8.1  | 6.6  | 8    |
| <i>Sample 138</i> | 10 | 9  | 11 | 10.5 | 11.7 | 10.3 |
| <i>Sample 139</i> | 1  | 1  | 1  | 38.8 | 44.4 | 34.2 |
| <i>Sample 140</i> | 34 | 37 | 36 | 50.8 | 46.9 | 48.2 |
| <i>Sample 141</i> | 30 | 30 | 29 | 52.4 | 51.8 | 51.3 |
| <i>Sample 142</i> | 17 | 18 | 19 | 34.1 | 33.8 | 34.9 |
| <i>Sample 143</i> | 12 | 19 | 12 | 9.6  | 10.9 | 9.3  |
| <i>Sample 144</i> | 11 | 8  | 38 | 63.4 | 68.2 | 73.2 |
| <i>Sample 145</i> | 10 | 13 | 13 | 48.3 | 52.3 | 49.6 |
| <i>Sample 146</i> | 6  | 6  | 10 | 41.8 | 45.6 | 45.3 |
| <i>Sample 147</i> | 9  | 13 | 9  | 31   | 35.1 | 32.8 |
| <i>Sample 148</i> | 15 | 13 | 13 | 53   | 50.2 | 52.7 |
| <i>Sample 149</i> | 4  | 7  | 7  | 4.7  | 4.1  | 5.4  |
| <i>Sample 150</i> | 3  | 2  | 2  | 35.4 | 32.9 | 31   |
| <i>Sample 151</i> | 8  | 8  | 6  | 6.9  | 8.1  | 8.8  |
| <i>Sample 152</i> | 3  | 3  | 2  | 28.5 | 26.5 | 33.4 |
| <i>Sample 153</i> | 17 | 15 | 20 | 29   | 28.4 | 29.4 |
| <i>Sample 154</i> | 16 | 16 | 19 | 39   | 38.3 | 37   |
| <i>Sample 155</i> | 14 | 13 | 16 | 81   | 78   | 75.6 |
| <i>Sample 156</i> | 21 | 17 | 20 | 30.9 | 33.6 | 29.8 |
| <i>Sample 157</i> | 18 | 21 | 23 | 14.2 | 16.9 | 18.2 |



|                   |    |    |    |      |      |      |
|-------------------|----|----|----|------|------|------|
| <i>Sample 158</i> | 8  | 7  | 5  | 20.8 | 20.8 | 20.8 |
| <i>Sample 159</i> | 18 | 19 | 17 | 30.2 | 28.5 | 26.4 |
| <i>Sample 160</i> | 0  | 0  | 0  | 0    | 0    | 0    |
| <i>Sample 161</i> | 0  | 0  | 0  | 0    | 0    | 0    |
| <i>Sample 162</i> | 0  | 0  | 0  | 0    | 0    | 0    |
| <i>Sample 163</i> | 0  | 0  | 0  | 0    | 0    | 0    |
| <i>Sample 164</i> | 0  | 0  | 0  | 0    | 0    | 0    |

**Table S11. CASA triplicate measurements at MGH fertility clinic for 112 samples.**

| <b>Sperm concentration</b> | <b># of samples</b> | <b>Mean % variation</b> |
|----------------------------|---------------------|-------------------------|
| <5 M/ml                    | 10                  | 86.7%                   |
| 5-10 M/ml                  | 34                  | 9.9%                    |
| 11-20 M/ml                 | 104                 | 4.4%                    |
| 21-50 M/ml                 | 338                 | 2.5%                    |
| 51-100 M/ml                | 351                 | 1.8%                    |
| 100-200 M/ml               | 188                 | 1.3%                    |
| >200 M/ml                  | 42                  | 1.9%                    |
| <b>Sperm motility</b>      | <b># of samples</b> | <b>Mean % variation</b> |
| <5 %                       | 24                  | 8.5%                    |
| 5-10 %                     | 209                 | 4.6%                    |
| 11-20 %                    | 179                 | 3.0%                    |
| 21-50 %                    | 668                 | 2.8%                    |
| > 50 %                     | 163                 | 2.7%                    |

**Table S12. Measurement of CASA accuracy against manual analysis.** Semen samples with various sperm concentration ranges were tested for sperm concentration and motility by the CASA system in parallel to manual semen analysis performed using a hemocytometer.

**Movie S1. Video of a semen sample recorded with the smartphone-based semen analyzer.** Data collected from this video were used to calculate sperm motility, concentration, and velocity parameters.
